RESEARCH ARTICLE

# Mortality among sexual and gender minority populations: A systematic review

Corinne E. Zachry<sup>1\*</sup>, Rory P. O'Brien<sup>1</sup>, Kirsty A. Clark<sup>2</sup>, Marissa L. Ding<sup>1</sup>, John R. Blossnich<sup>1</sup>

**1** Center for LGBTQ+ Health Equity, Suzanne Dworak-Peck School of Social Work, University of Southern California, Los Angeles, CA, United States of America, **2** Department of Medicine, Health and Society, Public Policy Studies, Vanderbilt University, Vanderbilt LGBTQ+ Policy Lab, Nashville, TN, United States of America

\* [czachry@usc.edu](mailto:czachry@usc.edu)

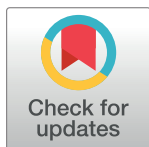

## OPEN ACCESS

**Citation:** Zachry CE, O'Brien RP, Clark KA, Ding ML, Blossnich JR (2025) Mortality among sexual and gender minority populations: A systematic review. PLoS ONE 20(2): e0307688. <https://doi.org/10.1371/journal.pone.0307688>

**Editor:** Binx Yezhe Lin, Virginia Tech Carilion Research Institute: Fralin Biomedical Research Institute at VTC, UNITED STATES OF AMERICA

**Received:** January 28, 2024

**Accepted:** July 9, 2024

**Published:** February 3, 2025

**Copyright:** © 2025 Zachry et al. This is an open access article distributed under the terms of the [Creative Commons Attribution License](https://creativecommons.org/licenses/by/4.0/), which permits unrestricted use, distribution, and reproduction in any medium, provided the original author and source are credited.

**Data Availability Statement:** All relevant data are within the manuscript and its [Supporting Information](#) files.

**Funding:** The project was partially supported by research awards from the National Institutes of Mental Health (DP2MH129967; R21MH125360). The funders had no role in the study design, data collection and analysis, decision to publish, or preparation of the manuscript.

**Competing interests:** The authors have declared that no competing interests exist.

## Abstract

Sexual and gender minority (SGM) populations experience elevated rates of negative health outcomes (e.g., suicidality) and social determinants (e.g., poverty), which have been associated with general population mortality risk. Despite evidence of disparities in threats to well-being, it remains unclear whether SGM individuals have greater risk of mortality. This systematic review synthesized evidence on mortality among studies that included information about SGM. Three independent coders examined 6,255 abstracts, full-text reviewed 107 articles, and determined that 38 met inclusion criteria: 1) contained a sexual orientation or gender identity (SOGI) measure; 2) focused on a mortality outcome; 3) provided SGM vs non-SGM (i.e., exclusively heterosexual and cisgender) or general population comparisons of mortality outcomes; 4) were peer-reviewed; and 5) were available in English. A search of included articles' references yielded 5 additional studies (total  $n = 43$ ). The authors used the NIH's Quality Assessment Tool for Observational Cohort and Cross-Sectional Studies to assess included studies. Mortality outcomes included all-cause ( $n = 27$ ), suicide/intentional self harm ( $n = 23$ ), homicide ( $n = 7$ ), and causes related to drug use ( $n = 3$ ). Compared to non-SGM people, 14 studies (32.6%) supported higher mortality for SGM, 28 studies (65.1%) provided partial support of higher mortality for SGM (e.g., greater mortality from one cause but not another), one study (2.3%) found no evidence of higher mortality for SGM. There was considerable heterogeneity in operational definitions of SGM populations across studies. Although mixed, findings suggest elevated mortality for SGM versus non-SGM populations. Integrating SOGI measures into mortality surveillance would enhance understanding of disparities by standardizing data collection, thereby reducing heterogeneity and increasing capacity to aggregate results (e.g., meta-analyses).

## Introduction

Across the world, sexual and gender minority (SGM) individuals experience adverse social determinants of health and substantial disparities in many health risks [1, 2] For example, a recent review of reviews identified greater prevalence of interpersonal violence across studies

from Africa, Asia, Australia, Europe, North and South Americas, and results of the World Health Organization World Mental Health Survey identified greater prevalence of substance use disorders amongst a global sample of sexual minority individuals. In the United States, the magnitude of these disparities has become clearer with emerging research following recent additions of self-reported sexual orientation and gender identity (SOGI) questions to federal health surveillance surveys [3–5]. For example, SGM populations more frequently report cigarette smoking, substance use, and suicidal ideation and attempt than do their non-SGM (i.e., identified as both exclusively heterosexual *and* exclusively cisgender) peers [6, 7].

In studies worldwide, minority stress has been used to explain the impacts of social stress experienced by people with stigmatized identities (e.g., SGM identities) [8–11]. Research on health disparities among SGM people has identified Minority Stress as a risk factor for many precursors to mortality, including suicidal ideation and attempts [12]. In addition to experiencing Minority Stress, which itself has been described as a social determinant of health for SGM people [13], SGM individuals are more likely than their non-SGM peers to report exposure to other harmful social determinants such as adverse childhood experiences [14], housing instability and homelessness [15], violent victimization [16], food insecurity [17], unemployment, and living in poverty [18]. Together, this research documents considerable adversity with clear implications for jeopardizing health, wellbeing, and longevity.

Despite evidence of reduced SGM health and wellbeing (e.g., psychopathology [9], physical health [19], worse self-rated health [20]), health equity research remains stymied by the lack of data about mortality. Globally, mortality information generally lacks in quality and coverage especially among countries in Africa and Asia, and to our knowledge, no government collects SOGI data in a standardized process at the time of death like other key demographics, such as age and sex [21, 22]. Consequently, it is unknown if mortality may be elevated for SGM populations.

The primary reasons to suspect greater mortality among SGM individuals hinge on evidence demonstrating that social adversity increases risk of mortality [23]. For example, in US studies that directly compare individuals experiencing homelessness to individuals with stable housing, risk of all-cause mortality ranges from 1.6 to over 3.0 times greater for homeless individuals [24–26]. SGM populations are more likely than their non-SGM peers to have experienced homelessness across the lifespan [27–29]. In another example, adverse childhood experiences are well-known predictors of premature mortality [30], with one US study estimating that experiencing >2 adverse childhood experiences increased risk of all-cause mortality by approximately 60% compared to people without adverse childhood experiences [31]. In the US, SGM populations are more likely to report adverse childhood experiences than their non-SGM peers [14, 32, 33], a finding that has been replicated in research in Asia and Europe [34]. For instance, Merrick et al. found that gay/lesbian adults reported an average of 2.2 adverse childhood experiences and bisexual adults reported an average of 3.1, compared to heterosexuals who reported an average of 1.6 [35]. Despite the substantial literature about greater burdens of social adversity faced by SGM populations and associations between social adversity and mortality risk, to date it is unclear whether the evidence about mortality, in aggregate, results in greater risk of death for SGM people.

Mortality data are both primary indicators of public health problems and necessary benchmarks for evaluating whether interventions to address public health problems are, in fact, reducing mortality or extending life. For example, inclusion of race in mortality surveillance made it possible to detect Black/African American women's greater risk of maternal mortality in the US and to design public health policies and programs to address the increased risk [36]. Most mortality surveillance datasets do not collect SOGI data, which prevents such progress in public health knowledge and intervention for SGM individuals [37]. In one rare instance, the

National Violent Death Reporting System (NVDRS) added sexual orientation and transgender status in 2013, but those data are not recorded systematically, with upwards of 80% of observations in the dataset missing information about sexual orientation and transgender status [38, 39]. Other studies in the US have attempted to assess SGM mortality using either self-reported survey data that were later paired with National Death Index (NDI) data [40, 41] or administrative data that permitted linkage to vital status information [42, 43]. Countries with national healthcare systems and marriage registers (e.g., Sweden, Denmark) have also attempted to estimate mortality through data linkages [42, 44]. However, findings from these studies on SGM mortality disparities are inconsistent and, given the limited assessment of SOGI information in mortality data, any one study is likely unable to depict SGM mortality disparities. However, in aggregate, existing studies may offer a more comprehensive assessment of the prevalence and magnitude of SGM disparities in mortality.

Thus, the current study sought to complete a systematic review of the literature on all-cause mortality among SGM individuals to explore whether studies of mortality indicate greater mortality rates or risk among SGM people in relation to non-SGM or general population comparators.

## Methods

### Inclusion/exclusion criteria

Included studies were 1) written or available in English; 2) published after the inception of the National Center for Health Statistics in 1960 for the collection and dissemination of mortality data [45]; 3) peer-reviewed; 4) measured sexual orientation and/or gender identity (inclusive of lesbian, gay, bisexual, transgender, or queer [LGBTQ+] sexual orientations and gender identities); 5) reported a mortality rate outcome of any cause; and 6) reported disaggregated mortality outcomes for SGM and a non-SGM comparison group (including either cisgender vs transgender, gay/bi/lesbian vs heterosexual, or SGM vs non-SGM). We excluded studies that did not meet inclusion criteria or 1) utilized exclusively qualitative methods; or 2) had a sample which consisted *solely* of people living with HIV or AIDS, given that this health crisis is well-known to have greatly skewed mortality among men who have sex with men and transgender women [46, 47]. However, HIV/AIDS was still included as a possible cause of death among samples with mixed HIV status. There were no restrictions or exclusions based upon geographical origin of study data and/or study participants. Inclusion and exclusion criteria are summarized in Table 1.

### Search process

The initial systematic search of the literature pertaining to mortality of SGM people was conducted on June 29, 2021. To ensure up-to-date findings, an additional search was conducted

**Table 1. Summary of inclusion and exclusion criteria.**

| Inclusion                                                                           | Exclusion                                                           |
|-------------------------------------------------------------------------------------|---------------------------------------------------------------------|
| 1) Written or available in English                                                  | 1) Utilized exclusively qualitative methods                         |
| 2) Published after 1960                                                             | 2) Sample consisted <i>solely</i> of people living with HIV or AIDS |
| 3) Peer-reviewed                                                                    |                                                                     |
| 4) Measured sexual orientation and/or gender identity                               |                                                                     |
| 5) Reported a mortality rate outcome of any cause                                   |                                                                     |
| 6) Reported disaggregated mortality outcomes for SGM and a non-SGM comparison group |                                                                     |

<https://doi.org/10.1371/journal.pone.0307688.t001>

on July 18, 2023. Both searches used seven databases; APA (including PsycArticles, PsycBooks, PsycInfo), Cumulative Index to Nursing and Allied Health Literature (CINAHL) Complete, Health Policy Reference Center, LGBTQ+ Source, Social Sciences Full Text, Health Source, MEDLINE and PubMed. In consultation with a systematic review librarian, database-specific thesauruses were used to generate core search terms relevant to sexual orientation (e.g., lesbians, gay men, bisexuals, sexual minorities), gender identity (e.g., transgender people, gender nonconformity), and mortality (e.g., death, suicide, homicide). The search was filtered by date (1960-present), language (English), and peer-review status. The review protocol and other materials are available upon request. The complete list of final search parameters is available in [S1 Table](#).

## Study team

The study team is comprised of five researchers, inclusive of faculty, doctoral students and an undergraduate student with research backgrounds spanning social work, public health, policy, emergency medicine, health service delivery and psychology. A majority of the members of the research team identify as sexual minority and/or gender diverse.

## Coding and extraction

The first and second author independently conducted the database searches using the identified key terms. Search results were compared and assessed for inconsistencies prior to being uploaded into the systematic review program Covidence, which mechanizes and documents the processes outlined in the PRISMA protocol [48], including removing duplicate records, screening, and extracting data. Utilizing PRISMA guidelines (Figs 1 and 2), titles and abstracts of 6,255 records were screened and dually coded by the first and second authors in the initial title and abstract screening stage. Articles were included in the full-text review if they appeared to meet inclusion criteria directly (i.e., specifying a mortality outcome and SGM participants) or if they specified a mortality outcome while being ambiguous about SOGI of participants (e.g., abstracts referring to “gender differences” broadly without specifying whether a binary measure of gender was used; or those referring ambiguously to “demographic factors”). Of those records, 107 full texts were reviewed and dually coded by the first and second authors for possible inclusion, of which 38 were included for this study.

The first, second, and senior authors conducted an ancestral search by reviewing reference sections from these 38 included articles to identify any potentially relevant titles. Twenty-nine potentially relevant titles were identified for abstract and title screening, of which 5 full text records were evaluated and 5 records included, bringing the total number of included studies to 43. Discrepancies in coding in any stage were resolved by the senior author. In the title and abstract screening stage, inter-rater agreement was 96.6%. Inter-rater agreement for the full text review stage was 85.1%.

The first, second, and senior authors independently extracted the following key information about each included study: country of origin, research questions/aims, hypotheses, data sources, sampling frames, population description, inclusion criteria, exclusion criteria, characteristics of comparison groups, whether the comparison was direct or indirect, study denominator or unit of analysis (i.e., sample size or person years), mortality metric, statistical methods and key findings. A summary of extracted data is presented in [Table 2](#), and full detail on extracted data can be found in [Table 3](#). Due to the heterogeneity of data sources, populations, predictors and outcomes among the included studies, the authors were not able to conduct a meta-analytic review. For example, included studies reported wide-ranging causes of death (e.g., accidents, intentional self-harm/suicide, influenza and pneumonia, breast cancer) for

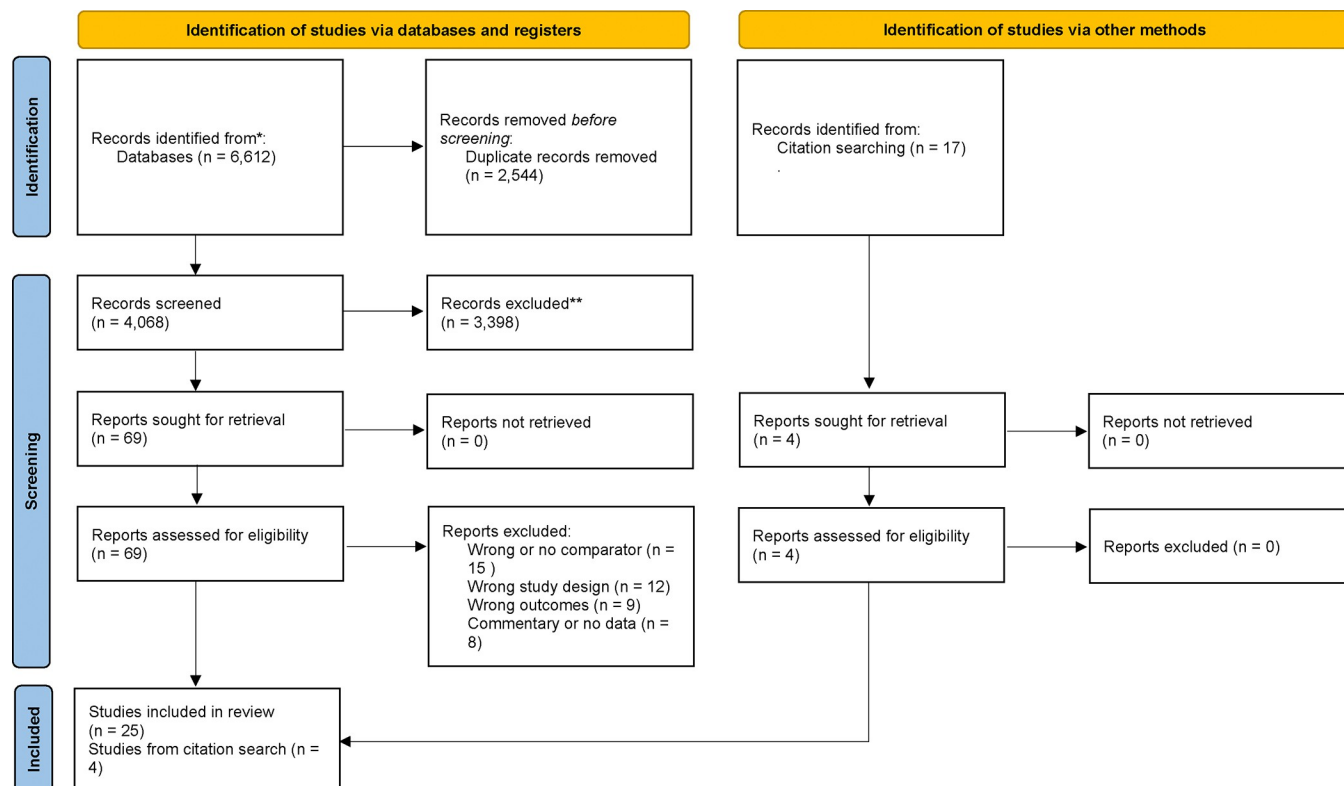

Fig 1. PRISMA flow diagram, initial search.

<https://doi.org/10.1371/journal.pone.0307688.g001>

which risk and survival are not comparable. Moreover, samples of SGM people in included studies were often comprised of individuals with characteristics that limit the generalizability of findings on mortality risk; for example, despite shared identities under the SGM umbrella, mortality rates among modern-day sexual minority United States military veterans [49], transgender people who have received gender affirming hormone therapy in the Netherlands [50], people who had been diagnosed with homosexuality as a psychiatric illness in the 1960s [51], people who use injection drugs [52] and patients in primary care clinics in the United Kingdom [53] cannot be assumed to be directly comparable due to potential differences in life experience that contribute to mortality risk.

## Quality assessment

Two study team members (second and senior authors) used the National Institute of Health's Quality Assessment Tool for Observational Cohort and Cross-Sectional Studies to independently assess the quality of the sampled studies [49]. The raters grouped their ratings into three qualitative groups (Good, Fair, and Poor) and then compared their ratings, achieving 96.55% agreement. Ratings are reported in Table 3.

## Results

Forty-three studies were identified that met study inclusion criteria. However, there may be additional relevant studies written in languages other than English, published in journals that are not indexed in the databases we included in our search, or disseminated in non-peer-reviewed distribution channels (e.g., grey literature).

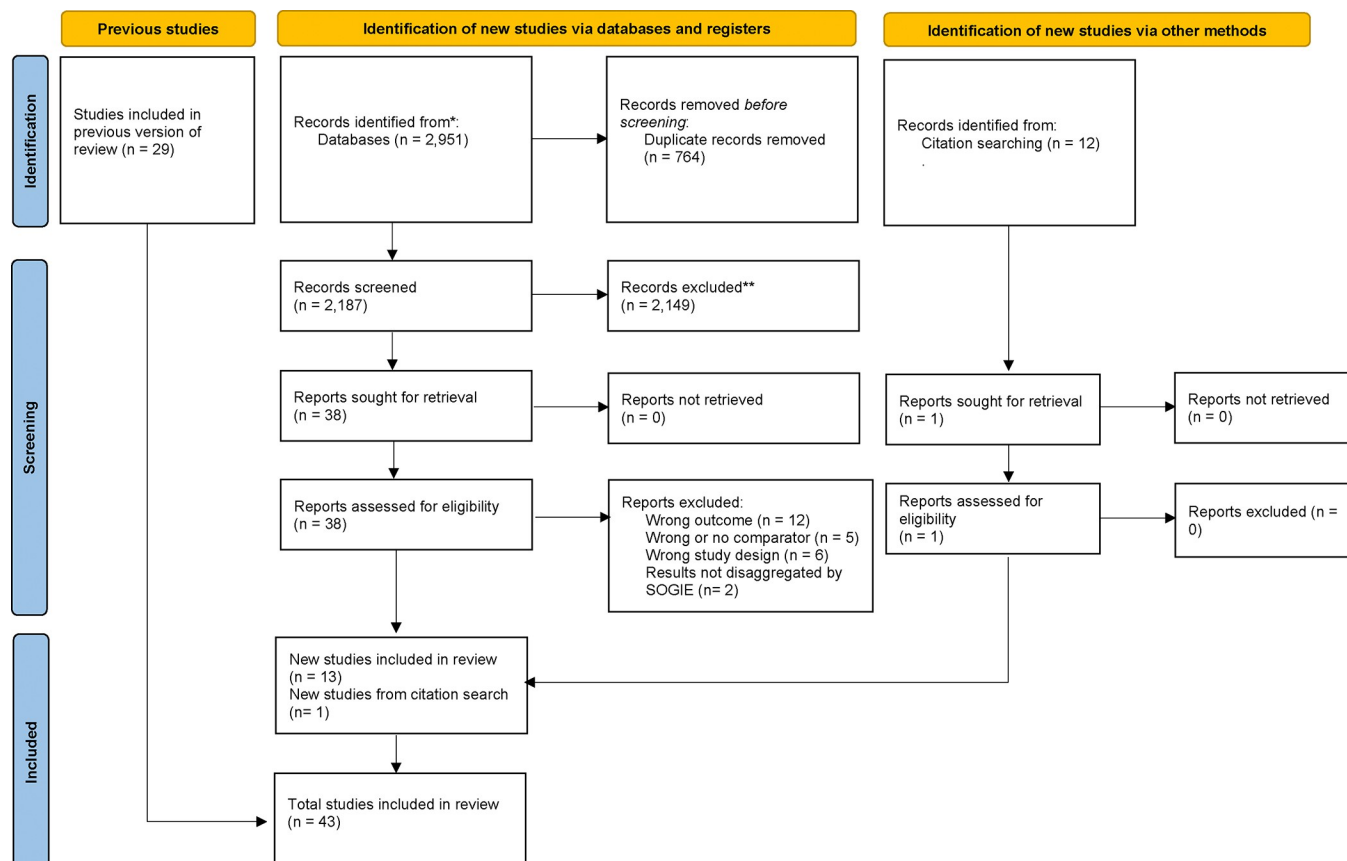

Fig 2. PRISMA flow diagram, updated search.

<https://doi.org/10.1371/journal.pone.0307688.g002>

Most reviewed studies came from the United States ( $n = 27$ ) and the remaining studies originated in the Netherlands ( $n = 5$ ), Sweden ( $n = 3$ ), Denmark ( $n = 4$ ), the United Kingdom ( $n = 2$ ) and Canada ( $n = 1$ ); one study included data from both Sweden and Denmark. The earliest reported data among the studies was collected beginning in 1967 [50]. Most studies examining SGM mortality were published within the past 15 years (81.4%), highlighting the relative recency of research on mortality for this population. Of the 43 studies reviewed, 62.8% ( $n = 27$ ) examined all-cause mortality, 53.5% ( $n = 23$ ) examined mortality from suicide/intentional self-harm, and 16.3% ( $n = 7$ ) examined homicide mortality. Three studies (7.0%) examined causes of death related to drug use, including 1 study (2.3%) which focused exclusively on mortality due to drug overdose. Overall, 14 studies (32.6%) reported consistently higher mortality rates and risk for SGM; 28 studies (65.1%) provided partial support for higher mortality among SGM (i.e., evidence for elevated mortality for some causes of death or some SGM subgroups, but not others); and 1 study (2.3%) found no evidence of higher mortality among SGM. Findings are presented in Tables 2 and 3 and described below. In order to maintain consistency with the information provided in the included studies, study results are described using the language of the original reports where applicable.

### All-cause mortality

Studies examining all-cause mortality reported mixed results. Eight all-cause mortality studies found evidence of consistently higher mortality among SGM [50–57]. The remaining 19 all-



Table 2. Summary of literature review findings.

| Cause of death         | SGM subgroup           | Study                                          | Mortality findings |
|------------------------|------------------------|------------------------------------------------|--------------------|
| Accidents              | Sexual minority people | Lynch et al., 2020                             | ↑                  |
|                        |                        | Salway et al., 2022                            | ↑                  |
|                        | Gender minority people | Asscheman, Gooren & Eklund, 1989               | ∅                  |
|                        |                        | van Kesteren, Asscheman, Megens & Gooren, 1997 | !                  |
| All cause              | Sexual minority people | Cochran & Mays, 2011                           | ↑                  |
|                        |                        | Cochran & Mays, 2012                           | ∅                  |
|                        |                        | Cochran & Mays, 2015                           | ∅                  |
|                        |                        | Cochran, Bjorkenstam & Mays, 2016              | ↑                  |
|                        |                        | Davis et al., 2017                             | ≈                  |
|                        |                        | Everett et al., 2021                           | ↑                  |
|                        |                        | Frisch & Brønnum-Hansen, 2009                  | ↑                  |
|                        |                        | Frisch & Simonsen, 2013                        | ↑                  |
|                        |                        | Koblin et al., 1992                            | ↑                  |
|                        |                        | Laughney & Eliason, 2022                       | ≈                  |
|                        |                        | Lehavot et al., 2016                           | ≈                  |
|                        |                        | Lindstrom & Rosvall, 2020                      | ≈                  |
|                        |                        | Lynch et al., 2020                             | ↑                  |
|                        |                        | Martin, Cloninger, Guze & Clayton, 1985        | ↑                  |
|                        |                        | Passaro et al., 2019                           | ↑                  |
|                        | Gender minority people | Salway et al., 2022                            | ↑                  |
|                        |                        | Asscheman et al., 2011                         | ≈                  |
|                        |                        | Asscheman, Gooren & Eklund, 1989               | ≈                  |
|                        |                        | Blosnich et al., 2014                          | ≈                  |
|                        |                        | Boyer et al., 2021                             | ↓                  |
|                        |                        | deBlok et al., 2021                            | ≈                  |
|                        |                        | Dhejne et al., 2011                            | ↑                  |
|                        |                        | Erlangsen et al., 2023                         | ↑                  |
|                        |                        | Hughes et al., 2022a                           | ≈                  |
|                        |                        | Hughes et al., 2022b                           | ↑                  |
|                        |                        | Jackson et al., 2023                           | ≈                  |
|                        |                        | van Kesteren, Asscheman, Megens & Gooren, 1997 | ∅                  |
| Alzheimer's disease    | Sexual minority people | Lynch et al., 2020                             | ↑                  |
| Cardiovascular disease | Sexual minority people | Frisch & Simonsen, 2013                        | ≈                  |
|                        |                        | Lehavot et al., 2016                           | ∅                  |
|                        |                        | Lynch et al., 2020                             | ↑                  |
|                        |                        | Salway et al., 2022                            | ↑                  |
|                        | Gender minority people | Asscheman et al., 2011                         | ≈                  |
|                        |                        | Asscheman, Gooren & Eklund, 1989               | ∅                  |
|                        |                        | deBlok et al., 2021                            | ≈                  |
|                        |                        | Dhejne et al., 2011                            | ↑                  |
|                        |                        | Jackson et al., 2023                           | ∅                  |
|                        |                        | van Kesteren, Asscheman, Megens & Gooren, 1997 | ∅                  |
| Cancer                 | Sexual minority people | Cochran & Mays, 2012                           | ↑                  |
|                        |                        | Cochran & Mays, 2015                           | ∅                  |
|                        |                        | Frisch & Simonsen, 2013                        | ≈                  |
|                        |                        | Lehavot et al., 2016                           | ↑                  |
|                        |                        | Lynch et al., 2020                             | ↑                  |

(Continued)

Table 2. (Continued)

| Cause of death                          | SGM subgroup           | Study                                          | Mortality findings |
|-----------------------------------------|------------------------|------------------------------------------------|--------------------|
|                                         |                        | Moore et al., 2023                             | ≈                  |
|                                         |                        | Salway et al., 2022                            | ∅                  |
|                                         | Gender minority people | Asscheman et al., 2011                         | ↑                  |
|                                         |                        | deBlok et al., 2021                            | ≈                  |
|                                         |                        | van Kesteren, Asscheman, Megens & Gooren, 1997 | ∅                  |
| <b>Digestive disease</b>                | Gender minority people | Asscheman et al., 2011                         | ∅                  |
|                                         |                        | Blosnich et al., 2014                          | ↑                  |
|                                         |                        | Jackson et al., 2023                           | ∅                  |
|                                         |                        | van Kesteren, Asscheman, Megens & Gooren, 1997 | ∅                  |
| <b>Drug-use related</b>                 | Sexual minority people | O'Driscoll et al., 2001                        | ≈                  |
|                                         |                        | Lynch et al., 2022                             | ↑                  |
|                                         | Gender minority people | Asscheman et al., 2011                         | ↑                  |
| <b>Endocrine disease</b>                | Sexual minority people | Lynch et al., 2020                             | ↑                  |
|                                         | Gender minority people | Asscheman et al., 2011                         | ∅                  |
|                                         |                        | Jackson et al., 2023                           | ∅                  |
| <b>Genitourinary disease</b>            | Gender minority people | Asscheman et al., 2011                         | ∅                  |
| <b>HIV/AIDS related</b>                 | Sexual minority people | Cochran & Mays, 2011                           | ↑                  |
|                                         |                        | Cochran & Mays, 2015                           | ∅                  |
|                                         |                        | Frisch & Simonsen, 2013                        | ≈                  |
|                                         |                        | Koblin et al., 1992                            | ↑                  |
|                                         |                        | Salway et al., 2022                            | !                  |
|                                         | Gender minority people | Asscheman et al., 2011                         | ≈                  |
|                                         |                        | deBlok et al., 2021                            | ↑                  |
|                                         |                        | van Kesteren, Asscheman, Megens & Gooren, 1997 | ↑                  |
| <b>Homicide</b>                         | Sexual minority people | Anderson et al., 2023                          | ↑                  |
|                                         |                        | Mize & Shackelford, 2008                       | ≈                  |
|                                         |                        | Ndimbie et al., 1994                           | !                  |
|                                         | Gender minority people | Anderson et al., 2023                          | ∅                  |
|                                         |                        | Asscheman, Gooren & Eklund, 1989               | ∅                  |
|                                         |                        | Boyer et al., 2021                             | ↑                  |
|                                         |                        | Dinno, 2017                                    | ↓                  |
|                                         |                        | van Kesteren, Asscheman, Megens & Gooren, 1997 | ∅                  |
| <b>Infectious and parasitic disease</b> | Gender minority people | Blosnich et al., 2014                          | ↑                  |
|                                         |                        | deBlok et al., 2021                            | ≈                  |
|                                         |                        | Jackson et al., 2023                           | ∅                  |
| <b>Influenza and pneumonia</b>          | Sexual minority people | Lynch et al., 2020                             | ↑                  |
| <b>Intentional self-harm/Suicide</b>    | Sexual minority people | Alvarez-Hernandez & Mowbray, 2023              | ↑                  |
|                                         |                        | Bjorkenstam et al., 2016                       | ≈                  |
|                                         |                        | Cochran & Mays, 2015                           | ≈                  |
|                                         |                        | Erlangsen et al., 2020                         | ↑                  |
|                                         |                        | Feigelman, Ploderl, Rosen & Cerel, 2019        | ≈                  |
|                                         |                        | Frisch & Brønnum-Hansen, 2009                  | ≈                  |
|                                         |                        | Frisch & Simonsen, 2013                        | ≈                  |
|                                         |                        | Lynch et al., 2020                             | ↑                  |
|                                         |                        | Mathy, Cochran, Olsen & Mays, 2011             | ↑                  |
|                                         |                        | Ndimbie et al., 1994                           | ∅                  |
|                                         |                        | Ream, 2019                                     | ↑                  |

(Continued)



Table 2. (Continued)

| Cause of death                  | SGM subgroup           | Study                                          | Mortality findings |
|---------------------------------|------------------------|------------------------------------------------|--------------------|
|                                 |                        | Salway et al., 2022                            | ∅                  |
|                                 | Gender minority people | Asscheman et al., 2011                         | ≈                  |
|                                 |                        | Asscheman, Gooren & Eklund, 1989               | ↑                  |
|                                 |                        | Biggs, 2022                                    | ↑                  |
|                                 |                        | Blosnich et al., 2014                          | ↑                  |
|                                 |                        | Blosnich et al., 2021                          | ↑                  |
|                                 |                        | Boyer et al., 2021                             | ↑                  |
|                                 |                        | deBlok et al., 2021                            | ≈                  |
|                                 |                        | Dhejne et al., 2011                            | ↑                  |
|                                 |                        | Erlangsen et al., 2023                         | ↑                  |
|                                 |                        | Ream, 2019                                     | ↑                  |
|                                 |                        | van Kesteren, Asscheman, Megens & Gooren, 1997 | ↑                  |
|                                 |                        | Wiepjes et al., 2020                           | ↑                  |
| Kidney disease                  | Sexual minority people | Lynch et al., 2020                             | ↑                  |
| Mental and behavioral disorders | Gender minority people | Jackson et al., 2023                           | ∅                  |
| Neoplasm                        | Gender minority people | Asscheman et al., 2011                         | ∅                  |
|                                 |                        | Dhejne et al., 2011                            | ↑                  |
|                                 |                        | Jackson et al., 2023                           | ∅                  |
| Nervous system disease          | Gender minority people | Asscheman et al., 2011                         | ∅                  |
|                                 |                        | Blosnich et al., 2014                          | ↓                  |
|                                 |                        | Jackson et al., 2023                           | ∅                  |
| Pancreatitis                    | Gender minority people | Asscheman, Gooren & Eklund, 1989               | ∅                  |
|                                 |                        | van Kesteren, Asscheman, Megens & Gooren, 1997 | ∅                  |
| Respiratory disease             | Sexual minority people | Frisch & Simonsen, 2013                        | ≈                  |
|                                 |                        | Lynch et al., 2020                             | ↑                  |
|                                 | Gender minority people | Asscheman et al., 2011                         | ∅                  |
|                                 |                        | Asscheman, Gooren & Eklund, 1989               | ∅                  |
|                                 |                        | Jackson et al., 2023                           | ∅                  |
|                                 |                        | van Kesteren, Asscheman, Megens & Gooren, 1997 | ∅                  |
| Stroke                          | Sexual minority people | Lynch et al., 2020                             | ↑                  |
|                                 | Gender minority people | Asscheman et al., 2011                         | ∅                  |
| Unknown cause of death          | Gender minority people | Asscheman et al., 2011                         | ≈                  |
|                                 |                        | Asscheman, Gooren & Eklund, 1989               | ↑                  |
|                                 |                        | van Kesteren, Asscheman, Megens & Gooren, 1997 | ∅                  |
| Another cause of death          | Sexual minority people | Cochran & Mays, 2011                           | ∅                  |
|                                 |                        | Cochran & Mays, 2015                           | ∅                  |
|                                 |                        | Frisch & Simonsen, 2013                        | ↑                  |
|                                 |                        | Ndimbie et al., 1994                           | !                  |
|                                 | Gender minority people | Blosnich et al., 2014                          | ∅                  |
|                                 |                        | deBlok et al., 2021                            | ≈                  |
|                                 |                        | Jackson et al., 2023                           | ≈                  |

↑ denotes consistently elevated mortality for a particular cause/group; ≈ denotes some evidence of elevated mortality for a particular cause/group; ∅ denotes no evidence of elevated mortality for a particular cause/group; ↓ denotes evidence of lower mortality for a particular cause/group; ! indicates insufficient information for analysis

<https://doi.org/10.1371/journal.pone.0307688.t002>

Table 3. Comprehensive literature review overview matrix.

| Study                                                       | Data source(s) and Country                                                                                                                   | Study population                                                                                  | Comparison group (direct or indirect)                                                                                                                                                                            | Study denominator (n or person years)                                                                                                                   | Causes of death examined                                                                                                             | Key findings on mortality for SGM*                                                                                                                                                                                                                                                                                                                                 | QA Rating |
|-------------------------------------------------------------|----------------------------------------------------------------------------------------------------------------------------------------------|---------------------------------------------------------------------------------------------------|------------------------------------------------------------------------------------------------------------------------------------------------------------------------------------------------------------------|---------------------------------------------------------------------------------------------------------------------------------------------------------|--------------------------------------------------------------------------------------------------------------------------------------|--------------------------------------------------------------------------------------------------------------------------------------------------------------------------------------------------------------------------------------------------------------------------------------------------------------------------------------------------------------------|-----------|
| Studies reporting consistently elevated mortality among SGM |                                                                                                                                              |                                                                                                   |                                                                                                                                                                                                                  |                                                                                                                                                         |                                                                                                                                      |                                                                                                                                                                                                                                                                                                                                                                    |           |
| Alvarez-Hernandez & Mowbray, 2023                           | National Violent Death Reporting System (NVDRS), United States                                                                               | Hispanic individuals whose deaths were recorded in NVDRS in 32 US states; 2012–2016               | Heterosexual Hispanic individuals in NVDRS (direct)                                                                                                                                                              | <ul style="list-style-type: none"> <li>Total n = 1,132</li> <li>5.1% LGB</li> </ul>                                                                     | <ul style="list-style-type: none"> <li>Suicide</li> </ul>                                                                            | ↑ <b>suicide mortality for LGB</b> (OR = 2.23 [1.12–4.45])                                                                                                                                                                                                                                                                                                         | Good      |
| Biggs, 2022                                                 | Suicides reported to Tavistock Board meetings, National Health Service, United Kingdom                                                       | Total patients referred to Gender Identity Development Service (GIDS); 2010–2020                  | Overall population of adolescents aged 14 to 17 in the United Kingdom (indirect)                                                                                                                                 | <ul style="list-style-type: none"> <li>Total n = 15,032</li> <li>Patient years = 30,080</li> <li>Deaths n = 4</li> </ul>                                | <ul style="list-style-type: none"> <li>Suicide</li> </ul>                                                                            | ↑ <b>GIDS patient suicide death rate</b> was 13/100,000; rate for overall population of adolescents 14–17 was 2.7/100,00; authors estimate GIDS patients had 5.5 times greater rate of suicide                                                                                                                                                                     | Fair      |
| Dhejne et al., 2011                                         | Linkage of several Swedish national registers: Hospital Discharge, Total Population, Medical Birth, Education, Cause of Death, Crime, Sweden | Individuals diagnosed with gender identity disorder & whose gender changed in register; 1973–2003 | Randomly selected controls with consistent sex designation & no gender identity disorder diagnosis (direct)                                                                                                      | <ul style="list-style-type: none"> <li>Total n = 3,564;</li> <li>People with gender changed n = 324;</li> <li>Control n = 3,240</li> </ul>              | <ul style="list-style-type: none"> <li>All-cause</li> <li>Suicide</li> <li>Cardiovascular disease (CVD)</li> <li>Neoplasm</li> </ul> | <b>Among individuals whose gender changed:</b><br>↑ <b>all-cause</b> (aHR = 2.8 [1.8–4.3])<br>↑ <b>suicide</b> (aHR = 19.1 [5.8–62.9])<br>↑ <b>CVD</b> (aHR = 2.5 [1.2–5.3])<br>↑ <b>neoplasm</b> (aHR = 2.1 [1.0–4.6])                                                                                                                                            | Good      |
| Erlangsen et al., 2020                                      | Danish Centralized Civil Register and Swedish Total Population Register, Danish and Swedish Cause of Death Registers, Denmark and Sweden     | People who married same-sex partners; 1989–2016                                                   | People who married different-sex partners between 1989–2016 (direct)                                                                                                                                             | <ul style="list-style-type: none"> <li>Total n = 3,947,266</li> <li>Same-sex married n = 28,649</li> <li>Different-sex married n = 3,918,617</li> </ul> | <ul style="list-style-type: none"> <li>Suicide</li> </ul>                                                                            | <b>Among people who entered same-sex marriages:</b><br>↑ <b>suicide</b> (IRR = 2.3, [1.9–2.8])<br>↑ <b>suicide</b> (females IRR = 2.7 [1.6–2.5]; males (IRR = 2.1 [1.7–2.7]),<br>↑ <b>suicide among older adults</b> (IRR = 2.8 [1.3–6.1])                                                                                                                         | Good      |
| Erlangsen et al., 2023                                      | Danish Civil Registration System, Denmark                                                                                                    | Transgender people living in Denmark, aged 15 years or older; 1980–2021                           | Non-transgender individuals' mortality rates (direct)                                                                                                                                                            | <ul style="list-style-type: none"> <li>Total n = 6,657,456</li> <li>Total person years = 171,023,873</li> <li>Transgender people = 3,759</li> </ul>     | <ul style="list-style-type: none"> <li>All-cause</li> <li>Suicide</li> </ul>                                                         | <b>Among transgender people:</b><br>↑ <b>suicide mortality</b> (aIRR = 3.5 [2.0–6.3])<br>↑ <b>non-suicide mortality</b> (aIRR = 1.9 [1.6–2.2])<br>↑ <b>all-cause mortality</b> (aIRR = 2.0 [1.7–2.4])                                                                                                                                                              | Good      |
| Everett et al., 2021                                        | The Chicago Health and Life Experiences of Women (CHLEW); National Death Index; next-of-kin reports, United States                           | Sexual minority women who participated in CHLEW                                                   | Life tables from Centers for Disease Control and Prevention for deaths expected in a general U.S. population of women with same age distribution and length of follow-up as those in the CHLEW sample (indirect) | <ul style="list-style-type: none"> <li>Total n = 775</li> <li>Deaths = 49</li> </ul>                                                                    | <ul style="list-style-type: none"> <li>All-cause</li> </ul>                                                                          | ↑ <b>all-cause mortality prevalence for sexual minority women</b> (6.32%) vs. expected mortality prevalence for general population of U.S. women (5.27%)                                                                                                                                                                                                           | Good      |
| Frisch & Brønnum-Hansen, 2009                               | Danish Civil Registration System, Denmark                                                                                                    | People who were in a same-sex marriage for at least 1 year; 1996–2011                             | Danish general population mortality rate (indirect)                                                                                                                                                              | <ul style="list-style-type: none"> <li>Total n = 8,333</li> <li>Deaths = 618</li> <li>Person years = 60,316</li> </ul>                                  | <ul style="list-style-type: none"> <li>All-cause</li> </ul>                                                                          | <b>Among those in a same-sex marriage:</b><br>↑ <b>overall excess death rate for men</b> (5.92/1000) and women (1.15/1000)<br>↑ <b>overall rate for men</b> (SMR = 1.78 [1.63–1.94]) and women (SMR = 1.34 [1.09–1.63])<br>↑ <b>overall rate highest in the 1–3 year period after marriage</b> for men (SMR = 2.65 [2.28–3.06]) and women (SMR = 1.91 [1.36–2.60]) | Good      |
| Koblin et al., 1992                                         | Epidemiological study, NYC Death Registry, United States                                                                                     | NYC MSM in two studies of hepatitis B virus infection; late 1970s                                 | Mortality rate of white men in the US aged 25–64 (indirect)                                                                                                                                                      | <ul style="list-style-type: none"> <li>Total n = 8,906</li> <li>Persons with cause of death data = 968</li> </ul>                                       | <ul style="list-style-type: none"> <li>All-cause</li> <li>HIV/AIDS</li> </ul>                                                        | ↑ <b>MSM</b> (SMR = 3.7 [3.4–3.9])<br>74.7% of deaths among MSM due to HIV-1/AIDS                                                                                                                                                                                                                                                                                  | Fair      |

(Continued)

Table 3. (Continued)

| Study                                   | Data source(s) and Country                                                                                                         | Study population                                                                                          | Comparison group (direct or indirect)                                                                                                                                         | Study denominator (n or person years)                                                                                    | Causes of death examined                                                                                                                                                                                                                                                                                          | Key findings on mortality for SGM*                                                                                                                                                                                                                                                                                                                                                                                                                                                                                                                                                                                                                                                                                                                                                                                                                                                                                                                                                           | QA Rating |
|-----------------------------------------|------------------------------------------------------------------------------------------------------------------------------------|-----------------------------------------------------------------------------------------------------------|-------------------------------------------------------------------------------------------------------------------------------------------------------------------------------|--------------------------------------------------------------------------------------------------------------------------|-------------------------------------------------------------------------------------------------------------------------------------------------------------------------------------------------------------------------------------------------------------------------------------------------------------------|----------------------------------------------------------------------------------------------------------------------------------------------------------------------------------------------------------------------------------------------------------------------------------------------------------------------------------------------------------------------------------------------------------------------------------------------------------------------------------------------------------------------------------------------------------------------------------------------------------------------------------------------------------------------------------------------------------------------------------------------------------------------------------------------------------------------------------------------------------------------------------------------------------------------------------------------------------------------------------------------|-----------|
| Lynch et al., 2020                      | VHA Corporate Data Warehouse, National Death Index, United States                                                                  | Veterans within the VHA outpatient care system with documented sexual minority identity between 2000–2017 | Mortality rates in the US population and the general VHA population (indirect)                                                                                                | <ul style="list-style-type: none"> <li>• Total <math>n = 96,893</math></li> <li>• Total deaths = 12,591</li> </ul>       | <ul style="list-style-type: none"> <li>• All-cause</li> <li>• Suicide</li> <li>• Cancer</li> <li>• Heart disease</li> <li>• Accidents</li> <li>• Respiratory disease</li> <li>• Stroke</li> <li>• Diabetes</li> <li>• Alzheimer's disease</li> <li>• Influenza and pneumonia</li> <li>• Kidney disease</li> </ul> | <p><b>Among sexual minority veterans:</b></p> <p>↑ <b>suicide</b> (SMR = 4.50 [4.13–4.99]) compared to US population rate</p> <p>↑ <b>suicide</b> (HR = 1.59 [1.55–1.64]) compared to non-sexual minority veterans</p> <p>↑ <b>cancer</b> (SMR = 3.35 [3.32–3.47]) compared to US population</p> <p>↑ <b>heart disease</b> (SMR = 3.78 [3.64–3.93]) compared to US population</p> <p>↑ <b>accident</b> (SMR = 2.82 [2.64–3.02]) compared to US population</p> <p>↑ <b>chronic lower respiratory disease</b> (SMR = 3.20 [2.96–3.45]) compared to US population</p> <p>↑ <b>stroke</b> (SMR = 2.50 [2.27–2.73]) compared to US population</p> <p>↑ <b>diabetes</b> (SMR = 3.37 [3.06–3.71]) compared to US population</p> <p>↑ <b>Alzheimer's disease</b> (SMR = 5.55 [4.96–6.19]) compared to US population</p> <p>↑ <b>influenza and pneumonia</b> (SMR = 2.86 [2.48–3.28]) compared to US population</p> <p>↑ <b>kidney disease</b> (SMR = 2.27 [1.93–2.66]) compared to US population</p> | Good      |
| Lynch et al., 2022                      | Veterans Health Administration (VHA) electronic health records; National Death Index, United States                                | Patients receiving VHA health care                                                                        | 5,300,521 non-LGB veterans (direct)                                                                                                                                           | <ul style="list-style-type: none"> <li>• Total <math>n = 537,661</math></li> <li>• LGB <math>n = 6,267</math></li> </ul> | <ul style="list-style-type: none"> <li>• Alcohol-attributable death</li> </ul>                                                                                                                                                                                                                                    | <p><b>Among all LGB veterans:</b></p> <p>↑ <b>overall alcohol-attributable mortality</b> (RR = 1.57 [1.48–1.66])</p> <p>↑ <b>chronic alcohol-attributable causes of mortality</b> (RR = 1.52 [1.40–1.64])</p> <p>↑ <b>acute alcohol-attributable causes of mortality</b> (RR = 1.64 [1.50–1.78])</p> <p><b>Among male LGB veterans:</b></p> <p>↑ <b>overall alcohol-attributable mortality</b> (RR = 1.82 [1.72–1.93])</p> <p>↑ <b>chronic alcohol-attributable causes of mortality</b> (RR = 1.70 [1.57–1.83])</p> <p>↑ <b>acute alcohol-attributable causes of mortality</b> (RR = 1.97 [1.80–2.14])</p> <p><b>Among female LGB veterans:</b></p> <p>↑ <b>overall alcohol-attributable mortality</b> (RR = 3.01 [2.66–3.35])</p> <p>↑ <b>chronic alcohol-attributable causes of mortality</b> (RR = 4.14 [3.57–4.72])</p> <p>↑ <b>acute alcohol-attributable causes of mortality</b> (RR = 2.34 [1.96–2.73])</p>                                                                           | Good      |
| Martin, Cloninger, Guze & Clayton, 1985 | Survey and interviews of patients from Jul 1, 1967–Nov 1, 1969, United States                                                      | Washington University in St Louis Clinic patients with psychiatric diagnosis of homosexuality             | Age-, sex-, and race-specific expectations derived from 1970 death rates for Missouri (indirect)                                                                              | <ul style="list-style-type: none"> <li>• Total <math>n = 494</math></li> <li>• Total deaths = 43</li> </ul>              | <ul style="list-style-type: none"> <li>• All-cause</li> </ul>                                                                                                                                                                                                                                                     | <p><b>Among patients with index psychiatric diagnosis of homosexuality:</b> ↑ <b>unnatural death</b> (SMR = 16.67 [95% CI not provided], <math>p &lt; 0.01</math>) no natural deaths! <b>no natural deaths</b></p>                                                                                                                                                                                                                                                                                                                                                                                                                                                                                                                                                                                                                                                                                                                                                                           | Poor      |
| Passaro et al., 2019                    | Data collected from gay and bisexual men (GBM) recruited in LA through media outlets & community centers, 1998–2000, United States | GBM who took part in an RCT for treatment of meth use/addiction                                           | Populations reported in CDC WONDER, matched by geography, age, & sex (indirect)                                                                                               | <ul style="list-style-type: none"> <li>• Total <math>n = 191</math></li> <li>• Total deaths = 24</li> </ul>              | <ul style="list-style-type: none"> <li>• All-cause</li> </ul>                                                                                                                                                                                                                                                     | <p>↑ <b>all-cause for GBM with methamphetamine dependence</b> (10 year SMR = 3.95 [2.89–5.01]; 20 year SMR = 3.39 [2.69–4.09]); mortality among GBM sample did not significantly differ based on HIV status (HIV+ CMR = 5.2/1,000 PY; HIV- CMR = 2.3/1,000PY; <math>p = 0.22</math>)</p>                                                                                                                                                                                                                                                                                                                                                                                                                                                                                                                                                                                                                                                                                                     | Fair      |
| Ream, 2019                              | NVDRS 2013–2015, United States                                                                                                     | LGBT youth and young adults who died by suicide                                                           | Youth and young adults who died by suicide & are not identified as LGBT (direct); comparison of LGBT youth percent of sample to LGBT percent in general population (indirect) | <ul style="list-style-type: none"> <li>• <math>n = 2,209</math></li> </ul>                                               | <ul style="list-style-type: none"> <li>• Suicide</li> </ul>                                                                                                                                                                                                                                                       | <p>↑ <b>suicide prevalence 8–24% among LGBT youth and young adults</b>, who comprise 4.5% of the general population</p>                                                                                                                                                                                                                                                                                                                                                                                                                                                                                                                                                                                                                                                                                                                                                                                                                                                                      | Poor      |

(Continued)

Table 3. (Continued)

| Study                                                           | Data source(s) and Country                                                                                                                                                                                                | Study population                                                                                                        | Comparison group (direct or indirect)                          | Study denominator (n or person years)                                                                                                                                          | Causes of death examined                                                                                                                                                                                                                                                                                                                                                                            | Key findings on mortality for SGM*                                                                                                                                                                                                                                                                                                                                                                                                                                                                                                                                                                                                                                                                                                                                                                                                                                                                                                                                                                                                                                                                                                                                                                                                                                                                                                                                                                                                                                                                                                                                                                                                                                                                                                                                                                                                                                                                             | QA Rating |
|-----------------------------------------------------------------|---------------------------------------------------------------------------------------------------------------------------------------------------------------------------------------------------------------------------|-------------------------------------------------------------------------------------------------------------------------|----------------------------------------------------------------|--------------------------------------------------------------------------------------------------------------------------------------------------------------------------------|-----------------------------------------------------------------------------------------------------------------------------------------------------------------------------------------------------------------------------------------------------------------------------------------------------------------------------------------------------------------------------------------------------|----------------------------------------------------------------------------------------------------------------------------------------------------------------------------------------------------------------------------------------------------------------------------------------------------------------------------------------------------------------------------------------------------------------------------------------------------------------------------------------------------------------------------------------------------------------------------------------------------------------------------------------------------------------------------------------------------------------------------------------------------------------------------------------------------------------------------------------------------------------------------------------------------------------------------------------------------------------------------------------------------------------------------------------------------------------------------------------------------------------------------------------------------------------------------------------------------------------------------------------------------------------------------------------------------------------------------------------------------------------------------------------------------------------------------------------------------------------------------------------------------------------------------------------------------------------------------------------------------------------------------------------------------------------------------------------------------------------------------------------------------------------------------------------------------------------------------------------------------------------------------------------------------------------|-----------|
| Wiepjes et al., 2020                                            | Medical charts for visitors to Center of Expertise on Gender Dysphoria of the Amsterdam UMC; National Civil Record Registry; hospital registration system, psychological, & medical files for cause of death, Netherlands | Clinically referred transgender people                                                                                  | Dutch population overall suicide rate for 2013–2017 (indirect) | <ul style="list-style-type: none"> <li>• Total <math>n = 8,263</math></li> <li>• Total deaths by suicide = 49</li> </ul>                                                       | <ul style="list-style-type: none"> <li>• Suicide</li> </ul>                                                                                                                                                                                                                                                                                                                                         | <p>↑ <b>mean number of suicides in transgender population</b> years 2013–2017 (overall 40/100,000 PY, transgender women 43/100,000 PY, transgender men 34/100,000 PY, Dutch population overall 11/100,000 PY)</p> <p>↑ <b>suicide risk for transgender women</b>, compared to transgender men (HR = 2.26 [1.06–4.82])</p>                                                                                                                                                                                                                                                                                                                                                                                                                                                                                                                                                                                                                                                                                                                                                                                                                                                                                                                                                                                                                                                                                                                                                                                                                                                                                                                                                                                                                                                                                                                                                                                      | Good      |
| Studies reporting some evidence of elevated mortality among SGM |                                                                                                                                                                                                                           |                                                                                                                         |                                                                |                                                                                                                                                                                |                                                                                                                                                                                                                                                                                                                                                                                                     |                                                                                                                                                                                                                                                                                                                                                                                                                                                                                                                                                                                                                                                                                                                                                                                                                                                                                                                                                                                                                                                                                                                                                                                                                                                                                                                                                                                                                                                                                                                                                                                                                                                                                                                                                                                                                                                                                                                |           |
| Anderson et al., 2023                                           | NVDRS, 2003–2017, United States                                                                                                                                                                                           | Homicide deaths among women in NVDRS-participating states                                                               | Non-SGM women decedents of IPH (direct)                        | <ul style="list-style-type: none"> <li>• Total <math>n = 18,702</math></li> <li>• SGM homicide deaths <math>n = 238</math></li> <li>• SGM IPH homicide deaths = 123</li> </ul> | <ul style="list-style-type: none"> <li>• Intimate partner homicide (IPH)</li> </ul>                                                                                                                                                                                                                                                                                                                 | <p>↑ <b>IPH mortality for sexual minority women</b> across racial groups; Black/African American (OR = 7.84 [3.65–16.88]), White (OR = 2.30 [1.03–5.17]), and Other race (OR = 12.83 [2.83–58.29])</p> <p>∅ <b>IPH mortality for transgender women</b> across racial groups; Black/African American (OR = 0.97 [0.43–2.24]), White (OR = 1.12 [0.17–7.24]), and Other race (OR = 3.03 [0.30–30.20])</p>                                                                                                                                                                                                                                                                                                                                                                                                                                                                                                                                                                                                                                                                                                                                                                                                                                                                                                                                                                                                                                                                                                                                                                                                                                                                                                                                                                                                                                                                                                        | Good      |
| Asscheman, Gooren & Eklund, 1989                                | Medical files from the authors' outpatient department, Netherlands                                                                                                                                                        | Individuals who have had cross-sex hormone treatment                                                                    | Dutch general population mortality rate (indirect)             | <ul style="list-style-type: none"> <li>• Total <math>n = 425</math></li> <li>• Total deaths = 12</li> </ul>                                                                    | <ul style="list-style-type: none"> <li>• All-cause</li> <li>• Suicide</li> <li>• Accidental drowning</li> <li>• Homicide</li> <li>• Myocardial infarction</li> <li>• COPD</li> <li>• Pancreatitis</li> <li>• Unknown cause</li> </ul>                                                                                                                                                               | <p>↑ <b>overall mortality of transgender patients</b> 2.5x to 9.0x expected mortality based on general population rate</p> <p>↑ <b>suicide for transgender women</b> greater than expected rate (3 observed [0.63–8.80]; 0.21 expected)</p> <p>↑ <b>unknown cause for transgender women</b> greater than expected rate (3 observed [0.63–8.80], 0.10 expected)</p> <p>∅ <b>rates of all other causes of death not significantly different</b> from expected rates</p>                                                                                                                                                                                                                                                                                                                                                                                                                                                                                                                                                                                                                                                                                                                                                                                                                                                                                                                                                                                                                                                                                                                                                                                                                                                                                                                                                                                                                                          | Good      |
| Asscheman et al., 2011                                          | Outpatient data, Dutch National Civil Record Registry, general population mortality, Netherlands                                                                                                                          | Individuals who have had cross-sex hormone treatment starting before July 1, 1997 and followed up for at least one year | General Dutch population mortality rate (indirect)             | <ul style="list-style-type: none"> <li>• Total <math>n = 1,331</math></li> <li>• Total deaths = 134</li> </ul>                                                                 | <ul style="list-style-type: none"> <li>• All-cause</li> <li>• Suicide</li> <li>• Neoplasm</li> <li>• Heart disease</li> <li>• Cerebrovascular accident</li> <li>• AIDS</li> <li>• Endocrine/diabetes</li> <li>• Respiratory disease</li> <li>• Digestive disease</li> <li>• Genitourinary disease</li> <li>• Nervous system disease</li> <li>• Illicit drug use</li> <li>• Unknown cause</li> </ul> | <p><b>Among transgender women:</b></p> <p>↑ <b>all-cause</b> (SMR = 1.51 [1.47–1.55])</p> <p>↑ <b>lung cancer</b> (SMR = 1.35 [1.14–1.58])</p> <p>↑ <b>hematological cancer</b> (SMR = 2.58 [1.97–3.30])</p> <p>↑ <b>heart disease</b> (SMR = 1.64 [1.43–1.87])</p> <p>↑ <b>AIDS</b> (SMR = 30.20 [1.47–1.55])</p> <p>↑ <b>illicit drug use</b> (SMR = 13.20 [9.70–17.6])</p> <p>↑ <b>suicide</b> (SMR = 5.70 [4.93–6.54])</p> <p>↑ <b>unknown cause</b> (SMR = 4.00 [3.53–4.51])</p> <p>∅ <b>all-cause age 65+</b> (SMR = 0.95 [0.86–1.06])</p> <p>∅ <b>other neoplasm</b> (total SMR = 0.98 [0.88–1.08]; digestive tract SMR = 0.42 [0.28–0.60]; brain SMR = 1.59 [0.95–2.46]; "other" SMR = 0.79 [0.57–1.07])</p> <p>∅ <b>cerebrovascular accident</b> (SMR = 1.26 [0.93–2.64])</p> <p>∅ <b>endocrine/diabetes</b> (SMR = 0.85 [0.41–1.32])</p> <p>∅ <b>respiratory disease</b> (SMR = 0.85 [0.61–1.14])</p> <p>∅ <b>digestive disease</b> (SMR = 1.01 [0.68–1.45])</p> <p>∅ <b>genitourinary disease</b> (SMR = 1.01 [0.68–1.45])</p> <p><b>! no nervous system disease deaths observed</b></p> <p><b>Among transgender men:</b></p> <p>↑ <b>illicit drug use</b> (SMR = 25.00 [6.00–32.5])</p> <p>∅ <b>all-cause</b> (SMR = 1.12 [0.89–1.59])</p> <p>∅ <b>all neoplasm</b> (total SMR = 0.99 [0.65–1.44]; lung SMR = 1.06 [0.26–3.19]; digestive tract SMR = 0.42 [0.28–0.60]; hematological SMR = 2.86 [0.69–8.57]; "other" SMR = 0.77 [0.25–1.77])</p> <p>∅ <b>heart disease</b> (SMR = 1.19 [0.39–2.74])</p> <p>∅ <b>digestive disease</b> (SMR = 2.56 [0.62–7.69])</p> <p>∅ <b>nervous system disease</b> (SMR = 3.57 [0.86–10.7])</p> <p>∅ <b>suicide</b> (SMR = 2.22 [0.53–6.18])</p> <p>∅ <b>unknown cause</b> (SMR = 2.08 [0.69–4.79])</p> <p><b>! no deaths observed by brain neoplasm, cerebrovascular accidents, AIDS, endocrine/diabetes, respiratory system, or genitourinary system</b></p> | Good      |

(Continued)

Table 3. (Continued)

| Study                             | Data source(s) and Country                                                                                                                                  | Study population                                                                                                                 | Comparison group (direct or indirect)                                                                                       | Study denominator (n or person years)                                                                    | Causes of death examined                                                                                                               | Key findings on mortality for SGM*                                                                                                                                                                                                                                                                                                                                                                                                                                                                                                                                                                                                                                                                                                                        | QA Rating |
|-----------------------------------|-------------------------------------------------------------------------------------------------------------------------------------------------------------|----------------------------------------------------------------------------------------------------------------------------------|-----------------------------------------------------------------------------------------------------------------------------|----------------------------------------------------------------------------------------------------------|----------------------------------------------------------------------------------------------------------------------------------------|-----------------------------------------------------------------------------------------------------------------------------------------------------------------------------------------------------------------------------------------------------------------------------------------------------------------------------------------------------------------------------------------------------------------------------------------------------------------------------------------------------------------------------------------------------------------------------------------------------------------------------------------------------------------------------------------------------------------------------------------------------------|-----------|
| Bjorkenstam et al., 2016          | Swedish Longitudinal Integration Database for Health Insurance and Labor Market Studies (LISA), National Patient Register, Causes of Death Register, Sweden | Residents who were newly partnered or married between January 1, 1996 and December 31, 2009                                      | Residents in different sex marriages or partnerships (direct)                                                               | <ul style="list-style-type: none"> <li>Total <math>n = 1,188,181</math></li> <li>Deaths = 865</li> </ul> | <ul style="list-style-type: none"> <li>Suicide</li> </ul>                                                                              | <ul style="list-style-type: none"> <li>↑ <b>suicide among same-sex married individuals</b> (IRR = 2.7 [1.5–4.8])</li> <li>↑ <b>suicide among same-sex married men</b> (IRR = 2.8 [1.5–5.5]), partially attenuated by adjusting for HIV status (aIRR = 2.3 [1.2–4.8])</li> <li>∅ <b>suicide among same-sex married women</b> (IRR = 2.5 [0.8–7.7])</li> </ul>                                                                                                                                                                                                                                                                                                                                                                                              | Good      |
| Blosnich et al., 2014             | VA National Patient Care Database, National Death Index mortality data, United States                                                                       | VHA users with an ICD-9-CM transgender-related diagnosis                                                                         | U.S. general population & non-transgender VHA population rates (indirect)                                                   | <ul style="list-style-type: none"> <li>Total <math>n = 5,117</math></li> <li>Deaths = 309</li> </ul>     | <ul style="list-style-type: none"> <li>All-cause</li> <li>Suicide</li> <li>Other leading causes of death</li> </ul>                    | <p><b>Among transgender veterans:</b></p> <ul style="list-style-type: none"> <li>↑ <b>suicide</b> (crude rate 82.5/100,000 person years for transgender veterans vs. 37.7/100,000 person years for VHA population)</li> <li>↑ <b>digestive system disease</b> (6.8% of deaths for transgender cohort vs. 3.6% in US population)</li> <li>↑ <b>infectious and parasitic disease</b> (6<sup>th</sup> leading cause of death for transgender veterans cohort vs. 9<sup>th</sup> leading cause in US population)</li> <li>↓ <b>diseases of the nervous system</b> (8<sup>th</sup> leading cause of death among transgender veterans cohort vs. 5<sup>th</sup> leading cause in US population)</li> <li>∅ <b>patterns of other mortality causes</b></li> </ul> | Fair      |
| Blosnich et al., 2021             | VHA EHR patient data 1999–2016, cross-referenced with National Death Index data up to Dec 31 2016, United States                                            | Transgender veterans, categorized based on ICD codes related to gender dysphoria, who were patients of the VHA between 1999–2016 | 3 non-transgender VHA patients randomly matched to a transgender patient at same VHA facility within 10 day window (direct) | <ul style="list-style-type: none"> <li>Total <math>n = 35,905</math></li> <li>Deaths = 8,866</li> </ul>  | <ul style="list-style-type: none"> <li>Suicide</li> </ul>                                                                              | <p><b>Among transgender patients:</b></p> <ul style="list-style-type: none"> <li>↑ <b>suicide prevalence</b> (0.81% for transgender patients vs. 0.26% for non-transgender patients, <math>p &lt; 0.01</math>)</li> <li>↑ <b>suicide, firearm</b> (aHR = 1.83 [1.14–2.94])</li> <li>↑ <b>suicide, poisoning</b> (aHR = 3.08 [1.33–7.14])</li> <li>∅ <b>suicide, hanging/suffocation</b> (aHR = 1.21 [0.52–3.27])</li> <li>∅ <b>suicide, other unspecified means</b> (aHR = 1.05 [0.17–6.53])</li> </ul>                                                                                                                                                                                                                                                   | Good      |
| Boyer et al., 2021                | VHA EHR patient data 1999–2016, cross-referenced with National Death Index data up to Dec 31 2016, United States                                            | Transgender veterans, categorized based on ICD codes related to gender identity, who were patients of the VHA between 1999–2016  | 3 Non-transgender VHA patients randomly matched to a transgender patient's ICD diagnosis at the same VHA facility (direct)  | <ul style="list-style-type: none"> <li>Total <math>n = 32,441</math></li> </ul>                          | <ul style="list-style-type: none"> <li>All-cause</li> <li>Suicide</li> <li>Homicide</li> </ul>                                         | <p><b>Among transgender veterans:</b></p> <ul style="list-style-type: none"> <li>↑ <b>suicide</b> (aHR = 2.77 [1.88–4.09])</li> <li>↑ <b>suicide age 18–39</b> (aHR = 3.35 [1.30–8.60])</li> <li>↑ <b>suicide age 65+</b> (aHR = 9.48 [3.88–23.19])</li> <li>↓ <b>all-cause</b> (aHR = 0.90 [0.84–0.97])</li> <li>∅ <b>all-cause age 18–39</b> (aHR = 1.07 [0.73–1.58])</li> <li>↓ <b>all-cause age 40–64</b> (aHR = 0.78 [0.72–0.86])</li> <li>↑ <b>all-cause age 65+</b> (aHR = 1.17 [1.03–1.33])</li> <li>↑ <b>homicide</b> (HR = 3.67 [1.51–8.91])</li> </ul>                                                                                                                                                                                         | Good      |
| Cochran & Mays, 2011              | NHANES III 1988–1994 and National Death Index up to Dec 31 2006, United States                                                                              | Men in the United States                                                                                                         | Male participants with "female partners only" & "no sexual partners" (direct)                                               | <ul style="list-style-type: none"> <li>Total <math>n = 5,574</math></li> <li>Deaths = 515</li> </ul>     | <ul style="list-style-type: none"> <li>All-cause</li> <li>HIV-related</li> <li>Causes other than HIV</li> </ul>                        | <p><b>Among men with any male sexual partners:</b></p> <ul style="list-style-type: none"> <li>↑ <b>HIV-related</b> (aHR = 157.37 [59.77–414.32])</li> <li>↑ <b>all-cause</b> (aHR = 3.59 [1.91–6.74])</li> <li>∅ <b>non-HIV-related</b> (aHR = 1.37 [0.58–3.21])</li> </ul>                                                                                                                                                                                                                                                                                                                                                                                                                                                                               | Good      |
| Cochran & Mays, 2012              | National Health Interview Survey, 1997–2003, United States                                                                                                  | Married and cohabiting women                                                                                                     | Married or cohabiting women with different-sex relationship partner (direct)                                                | <ul style="list-style-type: none"> <li>Total <math>n = 136,867</math></li> <li>Deaths = 4,396</li> </ul> | <ul style="list-style-type: none"> <li>All-cause</li> <li>Breast cancer</li> </ul>                                                     | <p><b>Among sexual minority women:</b></p> <ul style="list-style-type: none"> <li>∅ <b>all-cause</b> (aHR = 1.23 [0.66–2.32])</li> <li>↑ <b>breast cancer</b> (aHR = 3.24 [1.01–10.37])</li> </ul>                                                                                                                                                                                                                                                                                                                                                                                                                                                                                                                                                        | Good      |
| Cochran & Mays, 2015              | 2008 General Social Survey (GSS)—National Death Index (NDI) dataset, United States                                                                          | Adults reporting at least one lifetime sexual partner                                                                            | Presumptively heterosexual men and women in the dataset (direct)                                                            | <ul style="list-style-type: none"> <li>Total <math>n = 17,886</math></li> <li>Deaths = 3,304</li> </ul>  | <ul style="list-style-type: none"> <li>All-cause</li> <li>Intentional self-harm/suicide</li> <li>Breast cancer</li> <li>HIV</li> </ul> | <p><b>Among sexual minority men</b></p> <ul style="list-style-type: none"> <li>∅ <b>all-cause</b> (aHR = 1.04 [0.82–1.31])</li> <li>∅ <b>intentional self-harm</b> (aHR = 0.40 [0.05–3.05])</li> <li>∅ <b>HIV-related</b> (aHR = 1.29 [0.47–3.51])</li> <li>∅ <b>other conditions</b> (aHR = 1.06 [0.83–1.36])</li> </ul> <p><b>Among sexual minority women:</b></p> <ul style="list-style-type: none"> <li>↑ <b>intentional self-harm</b> (aHR = 6.28 [1.45–27.22])</li> <li>∅ <b>all-cause</b> (aHR = 1.06 [0.78–1.43])</li> <li>∅ <b>other conditions</b> (aHR = 0.96 [0.69–1.33])</li> <li>∅ <b>breast cancer</b> (aHR = 1.82 [0.63–5.32])</li> </ul>                                                                                                 | Good      |
| Cochran, Bjorkenstam & Mays, 2016 | National Death Index, linked to National Health and Nutrition Examination Survey (NHANES), United States                                                    | Individuals in NHANES/NDI file who report sexual orientation or sexual behavior                                                  | Exclusively heterosexual individuals in NHANES National Death Index File (direct)                                           | <ul style="list-style-type: none"> <li>Total <math>n = 15,564</math></li> <li>Deaths = 338</li> </ul>    | <ul style="list-style-type: none"> <li>All-cause</li> </ul>                                                                            | <ul style="list-style-type: none"> <li>↑ <b>all-cause for sexual minority people</b> (aHR = 2.02 [1.31–3.11])</li> <li>∅ <b>all-cause for sexual minority women</b> (aHR = 1.54 [0.70–3.36])</li> <li>↑ <b>all-cause for sexual minority men</b> (aHR = 2.45 [1.42–4.26])</li> <li>∅ <b>all-cause for sexual minority men, adjusted for HIV</b> (aHR = 1.60 [0.69–3.70])</li> </ul>                                                                                                                                                                                                                                                                                                                                                                       | Good      |

(Continued)

Table 3. (Continued)

| Study                                   | Data source(s) and Country                                                                                                                                                                                                                                                                                                                                                 | Study population                                                                                                                                               | Comparison group (direct or indirect)                                                                                                                                     | Study denominator (n or person years)                                                                                                                                                                                                                                    | Causes of death examined                                                                                                          | Key findings on mortality for SGM*                                                                                                                                                                                                                                                                                                                                                                                                                                                                                                                                                                                                                                                                                                                                                                                                                                                                                                                                                                                                                                                           | QA Rating |
|-----------------------------------------|----------------------------------------------------------------------------------------------------------------------------------------------------------------------------------------------------------------------------------------------------------------------------------------------------------------------------------------------------------------------------|----------------------------------------------------------------------------------------------------------------------------------------------------------------|---------------------------------------------------------------------------------------------------------------------------------------------------------------------------|--------------------------------------------------------------------------------------------------------------------------------------------------------------------------------------------------------------------------------------------------------------------------|-----------------------------------------------------------------------------------------------------------------------------------|----------------------------------------------------------------------------------------------------------------------------------------------------------------------------------------------------------------------------------------------------------------------------------------------------------------------------------------------------------------------------------------------------------------------------------------------------------------------------------------------------------------------------------------------------------------------------------------------------------------------------------------------------------------------------------------------------------------------------------------------------------------------------------------------------------------------------------------------------------------------------------------------------------------------------------------------------------------------------------------------------------------------------------------------------------------------------------------------|-----------|
| Davis et al., 2017                      | Interviews with people who inject drugs & Colorado Department of Public Health mortality records, United States                                                                                                                                                                                                                                                            | People who inject drugs (PWID) living in Denver, CO between 1996–2001                                                                                          | Heterosexual people who inject drugs (direct)                                                                                                                             | <ul style="list-style-type: none"> <li>Total <math>n = 2,007</math></li> <li>Deaths = 86</li> </ul>                                                                                                                                                                      | <ul style="list-style-type: none"> <li>All-cause</li> </ul>                                                                       | <ul style="list-style-type: none"> <li>↑ <b>gay and lesbian PWID</b> (HR = 2.22 [1.02–4.82])</li> <li>∅ <b>bisexual PWID</b> (HR = 1.12 [0.54–2.34])</li> </ul>                                                                                                                                                                                                                                                                                                                                                                                                                                                                                                                                                                                                                                                                                                                                                                                                                                                                                                                              | Fair      |
| deBlok et al., 2021                     | Cause of death from Statistics Netherlands, 1972–2018, Netherlands                                                                                                                                                                                                                                                                                                         | Adult transgender patients in a gender identity clinic who received hormone treatment                                                                          | Overall Dutch population of men and women (indirect)                                                                                                                      | <ul style="list-style-type: none"> <li>Total <math>n = 4,568</math> (2927 transgender women, 1641 transgender men)</li> <li>Deaths = 361 (317 transgender women, 44 transgender men)</li> </ul>                                                                          | <ul style="list-style-type: none"> <li>All-cause</li> <li>CVD</li> <li>Lung cancer</li> <li>Infection</li> <li>Suicide</li> </ul> | <p><b>Among transgender women, by comparison to general population women:</b></p> <ul style="list-style-type: none"> <li>↑ <b>overall mortality</b> (SMR = 2.8, [2.5–3.1])</li> <li>↑ <b>CVD</b> (SMR = 2.6, [1.9–3.4])</li> <li>↑ <b>all cancers</b> (SMR = 1.6, [1.3–2.0])</li> <li>↑ <b>lung cancer</b> (SMR = 3.1, [2.1–4.2])</li> <li>↑ <b>infection</b> (SMR = 8.7, [4.7–14.1])</li> <li>↑ <b>HIV-related disease</b> (SMR = 47.6 [5.8–132.6])</li> <li>↑ <b>non-natural causes of death</b> (SMR = 6.1 [2.0–8.4])</li> <li>↑ <b>suicide</b> (SMR = 6.8 [4.1–10.3])</li> </ul> <p><b>Among transgender men, by comparison to general population men:</b></p> <ul style="list-style-type: none"> <li>∅ <b>overall mortality</b> (SMR = 1.1 [0.8–1.5])</li> <li>∅ <b>CVD</b> (SMR = 0.8 [0.3–1.6])</li> <li>∅ <b>all cancers</b> (SMR = 0.8 [0.4–1.4])</li> <li>∅ <b>lung cancer</b> (SMR = 1.0 [0.2–2.3])</li> <li>∅ <b>non-natural causes of death</b> (SMR = 1.3 [0.5–2.5])</li> <li>∅ <b>suicide</b> (SMR = 1.2 [0.3–3.0])</li> <li>! <b>no infection deaths reported</b></li> </ul> | Good      |
| Dinno, 2017                             | <ul style="list-style-type: none"> <li>National Coalition of Anti-Violence Programs data on transgender homicide</li> <li>International Transgender Day of Remembrance data on transgender homicide</li> <li>Mic interviews</li> <li>National Center for Health Statistics Mortality Multiple Cause-of-Death Annual Public Use Records, 2010–2014 United States</li> </ul> | Transgender US residents                                                                                                                                       | General population homicide rate—presumed cisgender, intersected with age, gender and race/ethnicity (indirect)                                                           | $n = 69$                                                                                                                                                                                                                                                                 | <ul style="list-style-type: none"> <li>Homicide</li> </ul>                                                                        | <p>*Reported statistics assume transgender people represent 0.35% of the population</p> <ul style="list-style-type: none"> <li>↓ <b>homicide for transgender people</b> compared to cisgender people (RR = 0.24 [0.19–0.31])</li> <li>↑ <b>transfeminine Black people age 15–34 homicide</b> compared to Black cisfeminine people (RR = 4.03 [2.91–5.57])</li> <li>↑ <b>transfeminine Latin@ people age 15–34 homicide</b> compared to Latin@ cisfeminine people (RR = 2.40 [1.25–4.62])</li> <li>↓ <b>transfeminine Black people age 15–34 homicide</b> compared to Black cismasculine people (RR = 0.45 [0.32–0.63])</li> <li>↓ <b>transfeminine Latin@ people age 15–34 homicide</b> compared to Latin@ cismasculine people (RR = 0.35 [0.18–0.68])</li> </ul>                                                                                                                                                                                                                                                                                                                            | Poor      |
| Feigelman, Ploderl, Rosen & Cerel, 2019 | <ul style="list-style-type: none"> <li>General Social Survey (1988 to 2010)</li> <li>Add Health (Waves 1 and 2) United States</li> </ul>                                                                                                                                                                                                                                   | GSS: general US adult population who reported same-sex sexual activity<br>Add Health: general adolescent US population who reported same-sex sexual attraction | GSS: people who reported no lifetime same-sex sexual activity (direct);<br>Add Health: people who reported different-sex sexual attraction at Waves 1 and Wave 2 (direct) | <p>GSS:</p> <ul style="list-style-type: none"> <li>Total <math>n = 31,813</math></li> <li>Self-inflicted deaths = 197</li> </ul> <p>Add Health:</p> <ul style="list-style-type: none"> <li>Total <math>n = 20,538</math></li> <li>Self-inflicted deaths = 197</li> </ul> | <ul style="list-style-type: none"> <li>Suicide</li> </ul>                                                                         | <p>GSS:</p> <ul style="list-style-type: none"> <li>↑ <b>suicide among sexual minority women</b> (OR = 4.43 [1.01–19.47] for those with past year sexual minority sexual activity; OR = 4.84 [1.06–22.18] for those with sexual minority sexual activity in past 5 years)</li> <li>∅ <b>suicide among sexual minority men</b> (OR = 1.43 [0.44–4.59] for those with past year sexual minority sexual activity; OR = 1.51 [0.46–4.87] for those with sexual minority sexual activity in past 5 years)</li> </ul> <p>Add Health:</p> <ul style="list-style-type: none"> <li>∅ <b>suicide among sexual minority men</b> (OR = 0.47 [0.06–3.54])</li> <li>! <b>suicide rates</b> could not be calculated for <b>women</b> due to lack of observations</li> </ul>                                                                                                                                                                                                                                                                                                                                  | Poor      |

(Continued)

Table 3. (Continued)

| Study                   | Data source(s) and Country                                          | Study population                                                                                    | Comparison group (direct or indirect)                                                                                                                               | Study denominator (n or person years)                                                                                                                                                                                                              | Causes of death examined                                                                                                                                                                 | Key findings on mortality for SGM*                                                                                                                                                                                                                                                                                                                                                                                                                                                                                                                                                                                                                                                                                                                                                                                                                                                                                                                                                                                                                                                                                                                                                                                                                                                                                                                                                                                                                                                                                                                                                                                  | QA Rating |
|-------------------------|---------------------------------------------------------------------|-----------------------------------------------------------------------------------------------------|---------------------------------------------------------------------------------------------------------------------------------------------------------------------|----------------------------------------------------------------------------------------------------------------------------------------------------------------------------------------------------------------------------------------------------|------------------------------------------------------------------------------------------------------------------------------------------------------------------------------------------|---------------------------------------------------------------------------------------------------------------------------------------------------------------------------------------------------------------------------------------------------------------------------------------------------------------------------------------------------------------------------------------------------------------------------------------------------------------------------------------------------------------------------------------------------------------------------------------------------------------------------------------------------------------------------------------------------------------------------------------------------------------------------------------------------------------------------------------------------------------------------------------------------------------------------------------------------------------------------------------------------------------------------------------------------------------------------------------------------------------------------------------------------------------------------------------------------------------------------------------------------------------------------------------------------------------------------------------------------------------------------------------------------------------------------------------------------------------------------------------------------------------------------------------------------------------------------------------------------------------------|-----------|
| Frisch & Simonsen, 2013 | Danish Civil Registration System, Netherlands                       | Danish individuals registered in same-sex cohabitating relationships or marriages between 1982–2011 | Same-sex cohabitation was compared to opposite-sex cohabitation, multi-adult, and single households; Same-sex married was compared to opposite-sex married (direct) | <ul style="list-style-type: none"> <li>• Total <math>n = 6.79</math> million</li> <li>• Total deaths = 1,709,850</li> <li>• Total Person years = 122.5 million</li> <li>• Same-sex married, 0.2%</li> <li>• Same-sex cohabitating, 2.9%</li> </ul> | <ul style="list-style-type: none"> <li>• All-cause</li> <li>• Suicide</li> <li>• CVD</li> <li>• Cancer</li> <li>• Respiratory disease</li> <li>• AIDS</li> <li>• Other causes</li> </ul> | <p><b>Among same-sex married women:</b></p> <p>↑ <b>all-cause</b> (HR = 1.89 [1.60–2.23])</p> <p>∅ <b>CVD</b> (HR = 1.32 [0.75–2.33])</p> <p>↑ <b>cancer</b> (HR = 1.62[1.28–2.05])</p> <p>∅ <b>respiratory disease</b> (HR = 0.85 [0.36–2.05])</p> <p>↑ <b>suicide</b> (HR = 6.40[3.42–12.00])</p> <p>! <b>AIDS mortality</b> not observed</p> <p>↑ <b>other causes</b> (HR = 1.47[1.08–2.01])</p> <p><b>Among same-sex married men:</b></p> <p>↑ <b>all-cause</b> (HR = 1.38 [1.25–1.53])</p> <p>∅ <b>CVD</b> (HR = 1.23 [0.95–1.35])</p> <p>∅ <b>cancer</b> (HR = 1.12 [0.92–1.35])</p> <p>∅ <b>respiratory disease</b> (HR = 1.12 [0.73–1.74])</p> <p>↑ <b>suicide</b> (HR = 4.09[2.73–6.12])</p> <p>↑ <b>AIDS</b> (HR = 356[223–567]).</p> <p>↑ <b>other causes</b> (HR = 1.58[1.32–1.88])</p> <p><b>Among same-sex cohabitating women:</b></p> <p>↑ <b>all-cause</b> (HR = 2.04 [1.92–2.18])</p> <p>↑ <b>CVD</b> (HR = 1.59 [1.39–1.83])</p> <p>↑ <b>cancer</b> (HR = 1.37[1.22–1.54])</p> <p>↑ <b>respiratory disease</b> (HR = 2.10[1.74–2.33])</p> <p>∅ <b>suicide</b> (HR = 1.79 [0.99–3.27]),</p> <p>! <b>AIDS mortality</b> not observed</p> <p>↑ <b>other causes</b> (HR = 2.48[2.27–2.71])</p> <p><b>Among same-sex cohabitating men:</b></p> <p>↑ <b>all-cause</b> (HR = 1.70 [1.62–1.79])</p> <p>↑ <b>CVD</b> (HR = 1.75 [1.55–1.97])</p> <p>∅ <b>cancer</b> (HR = 1.11[1.00–1.23])</p> <p>↑ <b>respiratory disease</b> (HR = 2.16[1.80–2.59])</p> <p>↑ <b>suicide</b> (HR = 3.17[1.60–3.86]),</p> <p>↑ <b>AIDS</b> (HR = 49.8[30.4–81.6])</p> <p>↑ <b>other causes</b> (HR = 2.79 [2.59–3.01])</p> | Good      |
| Hughes et al., 2022a    | Optum Clinformatics Data Mart Database, 2011 to 2019, United States | Transgender enrollees using claims related to gender-affirming care                                 | 10% random sample of cisgender enrollees (direct)                                                                                                                   | <ul style="list-style-type: none"> <li>• Total <math>n = 2,876,073</math></li> <li>• Transgender <math>n = 18,033</math></li> </ul>                                                                                                                | <ul style="list-style-type: none"> <li>• All-cause</li> </ul>                                                                                                                            | <p><b>Among Black trans-feminine/nonbinary people:</b></p> <p>↑ risk of mortality vs. Black cisgender men (SMR = 2.38 [1.29–5.22])</p> <p>↑ risk of mortality vs. Black cisgender women (SMR = 3.3 [1.81–7.31])</p> <p><b>Among white trans-feminine/nonbinary people:</b></p> <p>↑ risk of mortality vs. white cisgender men (SMR = 1.98 [1.43–3.11])</p> <p>↑ risk of mortality vs. white cisgender women (SMR = 2.56 [1.85–4.03])</p> <p><b>Among Black trans-masculine/nonbinary people:</b></p> <p>∅ risk of mortality vs. Black cisgender men (SMR = 0.86 [0.39–2.62])</p> <p>∅ risk of mortality vs. Black cisgender women (SMR = 1.21 [0.55–3.66])</p> <p><b>Among white trans-masculine/nonbinary people:</b></p> <p>∅ risk of mortality vs. white cisgender men (SMR = 0.93 [0.60–3.44])</p> <p>∅ risk of mortality vs. white cisgender women (SMR = 1.27 [0.83–4.71])</p>                                                                                                                                                                                                                                                                                                                                                                                                                                                                                                                                                                                                                                                                                                                                | Good      |
| Hughes et al., 2022b    | Optum Clinformatics Data Mart Database, 2011 to 2019, United States | Transgender enrollees using claims related to gender-affirming care                                 | Non-transgender enrollees (direct)                                                                                                                                  | <ul style="list-style-type: none"> <li>• Total <math>n = 4,174,957</math></li> <li>• Transgender <math>n = 29,758</math> (58,525 person-years)</li> </ul>                                                                                          | <ul style="list-style-type: none"> <li>• All-cause</li> </ul>                                                                                                                            | <p><b>Among transgender people overall:</b></p> <p>↑ <b>mortality risk</b> vs. cisgender (SMR = 1.80 [1.67–1.93])</p> <p><b>Among trans-feminine/non-binary people:</b></p> <p>↑ <b>mortality risk</b> vs. non-trans males (SMR = 1.89 [1.57–2.27])</p> <p>↑ <b>mortality risk</b> vs. non-trans females (SMR = 2.57 [2.13–3.10])</p> <p><b>Among trans-masculine/non-binary people:</b></p> <p>↓ <b>mortality risk</b> vs. non-trans males (SMR = 0.64 [0.52–0.80])</p> <p><b>mortality risk</b> vs. non-trans females (SMR = 0.87 [0.70–1.08])</p> <p><b>Among unclassified trans people:</b></p> <p>↑ <b>mortality risk</b> vs. non-trans males (SMR = 1.93 [1.77–2.10])</p> <p>↑ <b>mortality risk</b> vs. non-trans females (SMR = 2.45 [2.25–2.67])</p>                                                                                                                                                                                                                                                                                                                                                                                                                                                                                                                                                                                                                                                                                                                                                                                                                                                       | Good      |

(Continued)



Table 3. (Continued)

| Study                     | Data source(s) and Country                                                                          | Study population                                                                                 | Comparison group (direct or indirect)                                                                                   | Study denominator (n or person years)                                                                                                | Causes of death examined                                                                                                                                                                                                                                                                                                   | Key findings on mortality for SGM*                                                                                                                                                                                                                                                                                                                                                                                                                                                                                                                                                                                                                                                                                                                                                                                                                                                                                                                                                                                                                                                                                                                                                                                                                                                                                                                                                                                                                                                                                                                                                                                                                                                                                                                                                                                                                                                                                                                                                                                                                                                                                                                                                                                                                                                                                                                                                                                                                                                                                                                                                                                                             | QA Rating |
|---------------------------|-----------------------------------------------------------------------------------------------------|--------------------------------------------------------------------------------------------------|-------------------------------------------------------------------------------------------------------------------------|--------------------------------------------------------------------------------------------------------------------------------------|----------------------------------------------------------------------------------------------------------------------------------------------------------------------------------------------------------------------------------------------------------------------------------------------------------------------------|------------------------------------------------------------------------------------------------------------------------------------------------------------------------------------------------------------------------------------------------------------------------------------------------------------------------------------------------------------------------------------------------------------------------------------------------------------------------------------------------------------------------------------------------------------------------------------------------------------------------------------------------------------------------------------------------------------------------------------------------------------------------------------------------------------------------------------------------------------------------------------------------------------------------------------------------------------------------------------------------------------------------------------------------------------------------------------------------------------------------------------------------------------------------------------------------------------------------------------------------------------------------------------------------------------------------------------------------------------------------------------------------------------------------------------------------------------------------------------------------------------------------------------------------------------------------------------------------------------------------------------------------------------------------------------------------------------------------------------------------------------------------------------------------------------------------------------------------------------------------------------------------------------------------------------------------------------------------------------------------------------------------------------------------------------------------------------------------------------------------------------------------------------------------------------------------------------------------------------------------------------------------------------------------------------------------------------------------------------------------------------------------------------------------------------------------------------------------------------------------------------------------------------------------------------------------------------------------------------------------------------------------|-----------|
| Jackson et al., 2023      | UK's Clinical Practice Research Datalink GOLD and Aurum databases, United Kingdom                   | Patients in about 22% of primary care practices across the UK between 1988 and 2019              | Cisgender men and cisgender women primary care patients (direct)                                                        | <ul style="list-style-type: none"> <li>• Total <math>n = 139,484</math></li> <li>• Transgender <math>n = 3,315</math></li> </ul>     | <ul style="list-style-type: none"> <li>• All-cause</li> <li>• Infectious and parasitic</li> <li>• Circulatory</li> <li>• Digestive</li> <li>• Nervous system</li> <li>• Respiratory</li> <li>• Endocrine, nutritional, metabolic</li> <li>• External cause</li> <li>• Mental and behavioral</li> <li>• Neoplasm</li> </ul> | <p><b>Among trans feminine people vs. cisgender men:</b></p> <p>↑ overall mortality (MRR = 1.34 [1.06–1.68])</p> <p>↑ cause not elsewhere classified (MRR = 4.87 [1.71–13.89])</p> <p>∅ infectious and parasitic diseases (MRR = 1.82 [0.41–8.01])</p> <p>∅ circulatory (MRR = 1.03 [0.66–1.59])</p> <p>∅ digestive (MRR = 1.15 [0.50–2.66])</p> <p>∅ nervous system (MRR = 0.78 [0.21–2.83])</p> <p>∅ respiratory (MRR = 0.94 [0.47–1.92])</p> <p>∅ endocrine, nutritional and metabolic (MRR = 1.81 [0.59–5.53])</p> <p>∅ external causes (MRR = 1.39 [0.77–2.49])</p> <p>∅ mental and behavioral disorders (MRR = 0.96 [0.34–2.68])</p> <p>∅ neoplasms (MRR = 0.78 [0.50–1.22])</p> <p><b>Among trans feminine people vs. cisgender women:</b></p> <p>↑ overall mortality (MRR = 1.60 [1.27–2.01])</p> <p>↑ external causes (MRR = 1.92 [1.95–3.50])</p> <p>↓ neoplasms (MRR = 0.52 [0.32–0.83])</p> <p>∅ infectious and parasitic diseases (MRR = 1.02 [0.24–4.43])</p> <p>∅ circulatory (MRR = 1.51 [0.94–2.42])</p> <p>∅ digestive (MRR = 1.14 [0.50–2.63])</p> <p>∅ nervous system (MRR = 0.54 [0.14–2.07])</p> <p>∅ respiratory (MRR = 0.95 [0.48–1.89])</p> <p>∅ endocrine, nutritional and metabolic (MRR = 2.84 [0.87–9.24])</p> <p>∅ mental and behavioral disorders (MRR = 0.87 [0.32–2.42])</p> <p>∅ cause not elsewhere classified (MRR = 3.49 [0.45–25.79])</p> <p><b>Among trans masculine people vs. cisgender men:</b></p> <p>∅ overall mortality (MMR = 1.43 [0.87–2.33])</p> <p>↑ cause not elsewhere classified (MRR = 9.27 [2.93–29.30])</p> <p>∅ circulatory (MRR = 0.83 [0.28–2.46])</p> <p>∅ digestive (MRR = 1.40 [0.16–12.07])</p> <p>∅ respiratory (MRR = 0.89 [0.14–5.74])</p> <p>∅ endocrine, nutritional and metabolic (MRR = 1.91 [0.29–12.60])</p> <p>∅ external causes (MRR = 1.84 [0.81–4.17])</p> <p>∅ mental and behavioral disorders (MRR = 0.93 [0.12–7.02])</p> <p>∅ neoplasms (MRR = 1.06 [0.50–2.27])</p> <p>! infectious and parasitic diseases—no cases reported</p> <p>! nervous system—no cases reported</p> <p><b>Among trans masculine people vs. cisgender women:</b></p> <p>↑ overall mortality (MMR = 1.75 [1.08–2.83])</p> <p>↑ external causes (MRR = 2.77 [1.15–6.65])</p> <p>∅ respiratory (MRR = 0.98 [0.16–5.90])</p> <p>∅ endocrine, nutritional and metabolic (MRR = 3.11 [0.46–20.90])</p> <p>∅ mental and behavioral disorders (MRR = 0.72 [0.10–5.31])</p> <p>∅ neoplasms (MRR = 0.71 [0.32–1.56])</p> <p>∅ cause not elsewhere classified (MRR = 6.83 [0.88–52.74])</p> <p>! infectious and parasitic diseases—no cases reported</p> <p>! nervous system—no cases reported</p> | Good      |
| Laughney & Eliason, 2022  | National Health and Nutrition Examination Survey; National Death Index, United States               | Survey respondents from 1999–2014                                                                | Non-sexual minority survey respondents (direct)                                                                         | <ul style="list-style-type: none"> <li>• Total <math>n =</math></li> <li>• Sexual minority <math>n = 1,580</math></li> </ul>         | <ul style="list-style-type: none"> <li>• All-cause</li> </ul>                                                                                                                                                                                                                                                              | <p>↑ mortality risk for sexual minority women vs. non-sexual minority women (aHR = 2.0 [1.3–3.2])</p> <p>∅ mortality risk for sexual minority men vs. non-sexual minority men (aHR = 0.9 [0.5–1.4])</p>                                                                                                                                                                                                                                                                                                                                                                                                                                                                                                                                                                                                                                                                                                                                                                                                                                                                                                                                                                                                                                                                                                                                                                                                                                                                                                                                                                                                                                                                                                                                                                                                                                                                                                                                                                                                                                                                                                                                                                                                                                                                                                                                                                                                                                                                                                                                                                                                                                        | Good      |
| Lehavot et al., 2016      | Women's Health Initiative Study: 21 years of observational study and clinical trials, United States | Postmenopausal women                                                                             | Sexual minority veterans vs sexual minority non-veterans vs heterosexual veterans vs heterosexual non-veterans (direct) | <ul style="list-style-type: none"> <li>• Total <math>n = 137,639</math></li> <li>• Sexual minority <math>n = 1,884</math></li> </ul> | <ul style="list-style-type: none"> <li>• All-cause</li> <li>• Cancer</li> <li>• CVD</li> </ul>                                                                                                                                                                                                                             | <p><b>Among sexual minority women:</b></p> <p>↑ all-cause (aHR = 1.20 [1.07–1.36])</p> <p>↑ cancer (aHR = 1.25 [1.03–1.51])</p> <p>∅ CVD (aHR = 1.17 [0.92–1.50])</p> <p><b>Among sexual minority women veterans:</b></p> <p>∅ all-cause (aHR = 1.03 [0.73–1.47])</p> <p>↑ cancer (aHR = 1.70 [1.01–2.85])</p> <p>∅ CVD (aHR = 0.65 [0.30–1.43])</p>                                                                                                                                                                                                                                                                                                                                                                                                                                                                                                                                                                                                                                                                                                                                                                                                                                                                                                                                                                                                                                                                                                                                                                                                                                                                                                                                                                                                                                                                                                                                                                                                                                                                                                                                                                                                                                                                                                                                                                                                                                                                                                                                                                                                                                                                                           | Good      |
| Lindstrom & Rosvall, 2020 | Scania Public health survey in 2008, Sweden                                                         | Survey responses from stratified sample of the official register population aged 18–80 in Scania | Heterosexual public health survey respondents (direct)                                                                  | <ul style="list-style-type: none"> <li>• Total <math>n = 25,071</math></li> </ul>                                                    | <ul style="list-style-type: none"> <li>• All-cause</li> </ul>                                                                                                                                                                                                                                                              | <p><b>Among sexual minority men vs. heterosexual men:</b></p> <p>↑ mortality for bisexual men (aHRR = 1.91 [1.10–3.30])</p> <p>∅ mortality for homosexual men (aHRR = 0.85 [0.38–1.90])</p> <p>∅ mortality for “other” men (aHRR = 1.28 [0.84–1.95])</p> <p><b>Among sexual minority women vs. heterosexual women:</b></p> <p>↑ mortality for bisexual women (aHRR = 3.18 [1.64–6.18])</p> <p>↑ mortality for “other” women (aHRR = 2.32 [1.47–3.67])</p> <p>∅ mortality for homosexual women (aHRR = 2.15 [0.89–5.19])</p>                                                                                                                                                                                                                                                                                                                                                                                                                                                                                                                                                                                                                                                                                                                                                                                                                                                                                                                                                                                                                                                                                                                                                                                                                                                                                                                                                                                                                                                                                                                                                                                                                                                                                                                                                                                                                                                                                                                                                                                                                                                                                                                    | Good      |

(Continued)

Table 3. (Continued)

| Study                                                                | Data source(s) and Country                                                                            | Study population                                                       | Comparison group (direct or indirect)                                              | Study denominator (n or person years)                                     | Causes of death examined                                                                                                                                                        | Key findings on mortality for SGM*                                                                                                                                                                                                                                                                                                                                                                                                                                                                                                                                                                                                                                                                                                                                                                                                                        | QA Rating      |
|----------------------------------------------------------------------|-------------------------------------------------------------------------------------------------------|------------------------------------------------------------------------|------------------------------------------------------------------------------------|---------------------------------------------------------------------------|---------------------------------------------------------------------------------------------------------------------------------------------------------------------------------|-----------------------------------------------------------------------------------------------------------------------------------------------------------------------------------------------------------------------------------------------------------------------------------------------------------------------------------------------------------------------------------------------------------------------------------------------------------------------------------------------------------------------------------------------------------------------------------------------------------------------------------------------------------------------------------------------------------------------------------------------------------------------------------------------------------------------------------------------------------|----------------|
| Mathy, Cochran, Olsen & Mays, 2011                                   | Danish National Board of Health 1990–2001 and census data from Statistics Denmark, Denmark            | Adults with same-sex registered partnerships                           | Adults presumed heterosexual (direct)                                              | • Total suicides 11,200                                                   | • Suicide                                                                                                                                                                       | ↑ <b>suicide for men in current or former same-sex registered partnership</b> (IRR = 8.19 [5.48–12.24])<br>∅ <b>suicide for women in same-sex registered partnership</b> (IRR = 1.65 [0.74–3.68])                                                                                                                                                                                                                                                                                                                                                                                                                                                                                                                                                                                                                                                         | Good           |
| Mize & Shackelford, 2008                                             | U.S. Federal Bureau of Investigation Supplementary Homicide Reports (SHR); Census data, United States | Perpetrators and victims of intimate partner homicide                  | Other intimate partner homicides in the SHR database (direct)                      | • Total n = 51,007<br>• Total SGM deaths = 1,092                          | • Intimate partner homicide                                                                                                                                                     | ↑ <b>intimate partner homicide among gay couples</b> (63.72/ million/annum vs. 21.25/ million/annum for heterosexual couples)<br>↓ <b>intimate partner homicide among lesbian couples</b> (9.07/ million/annum vs. 21.25/ million/annum for heterosexual couples)                                                                                                                                                                                                                                                                                                                                                                                                                                                                                                                                                                                         | Poor           |
| Moore et al., 2023                                                   | National Health and Nutrition Examination Survey; National Death Index, United States                 | Representative sample of non-institutionalized US residents, 2001–2010 | Heterosexual NHANES respondents (direct)                                           | • Total n = 12,470                                                        | • Cancer-related                                                                                                                                                                | ↑ <b>cancer-related mortality</b> for sexual minority people with high allostatic load vs. heterosexual people with high allostatic load (HR = 2.26 [1.33–3.84])<br>∅ <b>cancer-related mortality</b> for sexual minority people with low allostatic load vs. heterosexual people with low allostatic load (HR = 0.58 [0.22–1.54])                                                                                                                                                                                                                                                                                                                                                                                                                                                                                                                        | Good           |
| O'Driscoll et al., 2001                                              | Death certificates/ public health records, United States                                              | Cohort of injection drug users (IDUs)                                  | Heterosexual IDUs who died of accidental fatal drug overdose (direct)              | • Total n = 2,849<br>• Total deaths = 72                                  | • Fatal drug overdose                                                                                                                                                           | ↑ <b>accidental drug overdose among bisexual IDUs</b> (adjusted RR = 4.86 [2.30–13.20])<br>∅ <b>accidental drug overdose among gay IDUs</b> (adjusted RR = 3.54 [0.46–26.9])                                                                                                                                                                                                                                                                                                                                                                                                                                                                                                                                                                                                                                                                              | Poor/<br>Fair* |
| Salway et al., 2022                                                  | Canadian Community Health Survey; Canadian Mortality Database, Canada                                 | Canadian adults, ages 18–59, 2000–2017                                 | Heterosexual survey respondents (direct)                                           | • Total n = 442,260<br>• 2.4% LGB                                         | • All-cause<br>• Cancer<br>• Heart disease<br>• Accidents<br>• HIV<br>• Suicide                                                                                                 | <b>Among sexual minority people:</b><br>↑ <b>all-cause mortality</b> (uHR = 1.28 [1.06–1.55])<br>↑ <b>heart disease mortality</b> (uHR = 1.53 [1.03–2.29])<br>↑ <b>accident mortality</b> (uHR = 1.97 [1.01–3.86])<br>∅ <b>cancer mortality</b> (uHR = 0.86 [0.60–1.25])<br>∅ <b>suicide mortality</b> (uHR = 2.22 [0.93–5.30])<br>! <b>HIV mortality estimates not reported</b>                                                                                                                                                                                                                                                                                                                                                                                                                                                                          | Good           |
| van Kesteren, Asscheman, Megens & Gooren, 1997                       | Patient files from Dutch clinic between 1975–1994, Netherlands                                        | People treated with cross-sex hormones                                 | General population statistics, Netherlands Central Bureau of Statistics (indirect) | • Total n = 1,109<br>• Total deaths = 41                                  | • All-cause<br>• Suicide<br>• Homicide<br>• Accidental drowning<br>• Deaths of unknown cause<br>• Myocardial infarction<br>• COPD<br>• Pancreatitis<br>• AIDS<br>• Malignancies | <b>Among transgender women:</b><br>↑ <b>suicide</b> (SMR = 9.29 [4.94–15.88])<br>↑ <b>AIDS</b> (SMR = 6.0 [1.24–17.53])<br>∅ <b>all-cause</b> (SMR = 0.77 [0.55–1.05])<br>∅ <b>homicide</b> (SMR = 5.0 [0.13–27.86])<br>∅ <b>unknown cause</b> (SMR = 1.67 [0.45–4.27])<br>∅ <b>myocardial infarction</b> (SMR = 0.71 [0.26–1.55])<br>∅ <b>COPD</b> (SMR = 0.87 [0.11–3.14])<br>∅ <b>pancreatitis</b> (SMR = 0.59 [0.01–3.28])<br>∅ <b>malignancies</b> (total SMR = 0.46 [0.20–0.91]; pulmonary SMR = 0.47 [0.10–1.37]; gastric SMR = 0.91 [0.02–5.07]; leukemia SMR = 2.0 [0.05–11.14])<br>! <b>accidental drowning, glioblastoma, and meningioma deaths effect sizes not reported</b><br><b>Among transgender men:</b><br>∅ <b>all-cause</b><br>∅ <b>malignancies</b> (SMR = 11.49 [0.29–64.05])<br>∅ <b>gastric bleeding</b> (SMR = 5.0 [0.13–27.96]) | Good           |
| <b>Studies reporting no evidence of elevated mortality among SGM</b> |                                                                                                       |                                                                        |                                                                                    |                                                                           |                                                                                                                                                                                 |                                                                                                                                                                                                                                                                                                                                                                                                                                                                                                                                                                                                                                                                                                                                                                                                                                                           |                |
| Ndimbie et al., 1994                                                 | Pitt Men's Study, which is a component of the Multicenter AIDS Cohort Study (MACS), United States     | MSM who were either HIV positive or negative                           | General population of Allegheny County, Pennsylvania (indirect)                    | • Total n = 1,115<br>• Total deaths = 90<br>• Total unexpected deaths = 6 | • Suicide<br>• Homicide<br>• Sudden unexpected deaths                                                                                                                           | ∅ <b>MSM suicide</b> (No effect size reported)<br>∅ <b>MSM without AIDS sudden unexpected death rate</b> (38%) <b>similar to general population</b> (45%)<br>! <b>no homicides observed</b><br>! <b>no sudden unexpected deaths observed among AIDS patients</b>                                                                                                                                                                                                                                                                                                                                                                                                                                                                                                                                                                                          | Poor           |

↑ indicates that SGM group displays significantly higher mortality; ↓ indicates that SGM group displays significantly lower mortality; ∅ indicates no statistically significant difference in mortality between SGM and comparison group; ! indicates insufficient information for analysis; "QA" = quality assessment; \* indicates disagreement between raters on Quality Assessment

<https://doi.org/10.1371/journal.pone.0307688.t003>

cause mortality studies reported partial evidence of higher mortality among SGM [40, 41, 43, 58–73]. For example, a Dutch study found overall greater all-cause mortality for transgender women (standardized mortality ratio [SMR] = 1.51, 95%CI = 1.47–1.55) compared to the general Dutch population [59]. However, that same study showed no differences in all-cause mortality for transgender women over age 65 in age stratified models (SMR = 0.95, 95% CI = 0.86–1.06) and did not find overall greater all-cause mortality for transgender men compared to the general Dutch population (SMR = 1.12, 95% CI = 0.87–1.42) [59]. One study using electronic health record (EHR) data from the U.S. Department of Veterans Affairs (VA) found that transgender patients, overall, had significantly lower risk of all-cause mortality compared to a matched cisgender patient group (aHR = 0.90, 95% CI = 0.84–0.97) after adjusting for age, race/ethnicity, marital status, and sex [61]. However, in age-stratified models, transgender patients age 40–64 had significantly lower risk of all-cause mortality whereas transgender patients aged 65 years and older had a nearly 40% increased risk of all-cause mortality compared to cisgender patients [61].

### Cause-specific results

Studies reported evidence of higher mortality due to HIV/AIDS [54, 62, 73], unknown cause [58, 59], “unnatural” cause [50], and illicit drug use [59]. In a cohort study of people who use injection drugs, drug overdose mortality was found to be higher among bisexual, but not gay people who use injection drugs [74]. Most studies examining cancer deaths reported higher rates of cancer mortality for SGM populations overall, including greater lung cancer mortality observed among a sample of transgender women in the Netherlands (SMR = 1.35, 95% CI = 1.14–1.58) [59], elevated cancer mortality among same-sex married women in Denmark (HR = 1.62, 95% CI = 1.28–2.05) [65], and greater cancer mortality among a sample of post-menopausal sexual minority women (HR = 1.25, 95% CI = 1.03–1.51); this effect was further elevated for the sexual minority veterans in the study (HR = 1.70, 95% CI: 1.01–2.85) [70]. Two studies examining mortality specific to breast cancer show conflicting evidence, with 1 study reporting higher breast cancer mortality among women married to or cohabiting with a female relationship partner (aHR = 3.24, 95% CI = 1.01–10.37) [63] and the other study reporting null findings regarding breast cancer mortality rates for women who reported having any female sexual partners in their lifetime (aHR = 1.82, 95% CI = 0.63–5.32) [41]. Studies examining other neoplasms reported heightened neoplasm mortality overall for people who had undergone gender affirming surgery (aHR = 2.1, 95% CI = 1.0–4.6) [51], but did not observe differences in any kind of neoplasm mortality for transgender men who had undergone gender affirming surgery [59].

Cardiovascular/heart disease mortality was reported to be elevated for people who had undergone gender affirming surgery [51], transgender women [59, 73], same-sex cohabiting women and men [65], sexual minority Canadians [72], and sexual minority veterans [56], although some studies also reported null findings for cardiovascular/heart disease mortality rates among same-sex married women and men [65], sexual minority women [70], sexual minority women veterans [70], and transgender men [59]. Four included studies examined SGM mortality due to accidents. Two studies found differential risk for accident mortality among sexual minority people, while the two studies examining accident mortality among gender minority people reported null findings or insufficient data [56, 58, 60, 72]. One study observed sudden unexpected deaths, reporting a null effect (45% of deaths in the comparison group vs. 38% of deaths among gay and bisexual men without HIV), although this finding was based on a very limited number of sudden unexpected deaths in the cohort of gay and bisexual men during the course of that study [75].

One study found evidence that the overall patterns in causes of death among transgender veterans generally do not differ significantly from the patterns in causes of death among the general U.S. population, with diseases of the circulatory system, neoplasms, external causes and diseases of the respiratory system being the four leading causes of death in both groups [43]. However, a few exceptions were reported, with transgender veterans observed to have elevated mortality from digestive system disease (6.8% of deaths among transgender veterans vs. 3.6% of deaths among the general U.S. population) and infectious/parasitic disease (6<sup>th</sup> leading cause of death among transgender veterans vs. 9<sup>th</sup> leading cause of death among the general U.S. population), and reduced mortality from diseases of the nervous system (8<sup>th</sup> leading cause of death among transgender veterans vs. 5<sup>th</sup> leading cause of death among the general U.S. population).

### Suicide mortality

Studies examining suicide/intentional self-harm mortality for SGM people also displayed mixed results. Five studies examining suicide mortality documented consistently higher suicide mortality for sexual minority people compared to heterosexual people [39, 42, 56, 76, 77]. Transgender people were found to have substantially elevated risk of death by suicide/intentional self-harm compared to cisgender people across 10 studies, although elevated risk was not always observed for both transgender women and transgender men [43, 52, 58–61, 73, 78, 79]. A study comparing transgender and cisgender veterans found that transgender veterans had a nearly threefold risk of suicide mortality (aHR = 2.77, 95% CI = 1.88–4.09) [61]. Elevated suicide mortality risk was also observed for a sample of sexual minority veterans' whose crude suicide rates were 2.18 times those of non-sexual minorities (82.5 vs. 37.7 per 100,000 person-years) [43]. In a study of suicide death records, LGBT youth aged 12–14 accounted for 24% of suicides in that age group while comprising only 8.9% of the study sample [39].

Five studies of suicide mortality reported partial evidence of higher suicide mortality among SGM, whereby certain SGM subgroups, but not others, displayed higher levels of mortality attributable to suicide in relation to the comparison group [44, 59, 65, 73, 80]. For example, a study reported null findings for sexual minority women (RR = 1.65, 95% CI = 0.74–3.68), but observed greater risk of suicide mortality for sexual minority men (RR = 8.19, 95% CI = 5.48–12.24) [42]. A study of transgender Veterans Health Administration patients reported on differences in risk of death by suicide by several means. After adjusting for demographics and history of depression, transgender VHA patients were at increased risk of suicide by firearm (aHR = 1.83, 95% CI = 1.14–2.94) and self-poisoning (aHR = 3.08, 95% CI = 1.33–7.14) compared to non-transgender VHA patients, but not by hanging, strangulation and suffocation (aHR = 1.31, 95% CI = 0.52–3.27) or other means of self-harm (aHR = 1.05, 95% CI = 0.17–6.53) [79]. Suicide mortality risk was reported to be higher among transgender women than among transgender men in one study (HR = 2.26, 95% CI = 1.06–4.82; 0.8% of transgender women vs. 0.3% of transgender men) [78].

Two other included studies reported no evidence of significant differences in suicide mortality for SGM [72, 75]. However, one of these studies reported constraints on analysis and interpretation of the data due to the rarity of death by suicide among their samples, making it challenging to understand whether null findings are attributable to issues with statistical power or a true null effect [75].

### Homicide mortality

Studies examining homicide mortality for SGM populations also displayed mixed results. One study of VHA patients found consistent evidence of higher homicide mortality among

transgender patients in an unadjusted model (HR = 3.67, 95% CI = 1.51–8.91) [61]. However, homicide remained a rare occurrence in both the transgender and cisgender sample, impeding interpretation and generalizability of the findings. Three studies of homicide mortality reported some evidence of higher homicide mortality among SGM, whereby at least one SGM subgroup displayed higher levels of mortality attributable to homicide relative to the comparison group. For example, in a study of intimate partner homicide, gay couples were observed to have a higher rate of intimate partner homicide victimization (63.72 homicides per million per annum) than heterosexual couples (21.25 homicides per million per annum), while lesbian couples were observed to have a lower rate of intimate partner homicide than heterosexual couples (9.07 homicides per million per annum) [81]. In another study, which sought to account for assumed undercounting of transgender people in population estimates, transgender people overall were estimated to have lower risk of homicide mortality in relation to cisgender people, with three-quarters of the RR estimates being below 1.0. The notable exceptions to this pattern were young Black and Latinx transgender women, for whom all RR estimates exceed 1.0, indicating greater risk than the comparison group [82]. One remaining study sought to examine sudden unexpected or violent causes of death, including homicide, but homicide was not found to be a cause of death in any cases and therefore could not be analyzed [75].

**Measurement of sexual orientation and gender identity in mortality studies.** Because operationalization of SOGI can vary across studies, and consequently impact the validity of findings, we also summarized the SOGI measures across included studies.<sup>39</sup> Of the 28 studies which reported sexual orientation data (62.2%), 12 studies measured sexual orientation via proxy (e.g., same-sex partnership registered with the government), 4 studies measured sexual orientation via self-reported identity only, 4 studies measured sexual orientation via self-reported behavior only, 3 studies measured sexual orientation using both self-reported identity and self-reported behavior and 1 study measured sexual orientation using an unspecified method of self-report. Three studies did not specify how they measured sexual orientation, with two of these studies describing only venue-based recruitment (e.g., “gay venues, bath-houses”), rather than providing information about specifically if or how sexual orientation was assessed, and one study describing neither the method for measuring sexual orientation nor procedures for recruiting sexual minority participants. Of the 17 studies which reported gender identity data (37.8%), all 17 measured gender identity via proxy (e.g., treatment sought for gender dysphoria). Two of the aforementioned studies examined mortality outcomes among both sexual minority and gender diverse people. Table 4 provides an overview of SOGI measurement methods across included studies.

## Discussion

Public health policy and intervention decision-making depends on the availability of accurate vital statistics including mortality data. Yet research on disparities in SGM mortality remains scant, largely due to still limited progress in adoption of SOGI measures in public health surveillance systems. The current study sought to review mortality studies from the past 5 decades to begin to quantify SGM mortality risk.

In total, we identified just 43 studies that met review criteria representing a wide historical period from data collected 1967 onwards. Findings from this systematic review illustrate that, even with limited data and significant heterogeneity of recording of SOGI information in mortality studies, there seemed concordance in aggregate-level analyses showing greater all-cause mortality for SGM than non-SGM populations. Attempts at disaggregated analysis (e.g., transgender men, transgender women) yielded less consistent findings, likely due to small sample

Table 4. SOGI measurement in included studies.

| Study                                   | SO or GI or both?  | Proxy or self-report                   | Measure of SOGI                                                                                                                                                                     |
|-----------------------------------------|--------------------|----------------------------------------|-------------------------------------------------------------------------------------------------------------------------------------------------------------------------------------|
| Alvarez-Hernandez & Mowbray, 2023       | Sexual orientation | Proxy                                  | Informant reports of decedent sexual orientation in NVDRS                                                                                                                           |
| Anderson, Marlow & Izugbara, 2023       | Both               | Proxy                                  | Informant reports of SOGI in NVDRS records, coroner notes and/or law enforcement notes                                                                                              |
| Asscheman et al, 2011                   | Gender identity    | Proxy                                  | Referral to the outpatient department of university gender clinic                                                                                                                   |
| Asscheman, Gooren & Eklund, 1989        | Gender identity    | Proxy                                  | Presence of reported “problem of gender dysphoria” in outpatient clinic records                                                                                                     |
| Biggs, 2022                             | Gender identity    | Proxy                                  | Referral to pediatric gender clinic                                                                                                                                                 |
| Bjorkenstam et al., 2016                | Sexual orientation | Proxy                                  | Registered same-sex partnership or marriage                                                                                                                                         |
| Blosnich et al., 2014                   | Gender identity    | Proxy                                  | Based on presence of International Classification of Disease (ICD-9) codes related to gender dysphoria in medical records                                                           |
| Blosnich et al., 2021                   | Gender identity    | Proxy                                  | Based on presence of International Classification of Disease (ICD-9 and ICD-10) codes related to gender dysphoria in medical records                                                |
| Boyer et al., 2021                      | Gender identity    | Proxy                                  | Based on presence of International Classification of Disease (ICD-9 and ICD-10) codes related to transgender identity in medical records                                            |
| Cochran, Bjorkenstam & Mays, 2016       | Sexual orientation | Self-reported identity and/or behavior | Self-reported identity and sex of lifetime sexual partners                                                                                                                          |
| Cochran & Mays, 2011                    | Sexual orientation | Self-reported behavior                 | Genders of lifetime sexual partners                                                                                                                                                 |
| Cochran & Mays, 2012                    | Sexual orientation | Proxy                                  | Gender of relationship partner, provided the partner resides within the household                                                                                                   |
| Cochran & Mays, 2015                    | Sexual orientation | Self-reported behavior                 | Sex of sexual partners in lifetime or in the past year                                                                                                                              |
| Davis et al., 2017                      | Sexual orientation | Not specified                          | Not specified                                                                                                                                                                       |
| deBlok et al., 2021                     | Gender identity    | Proxy                                  | Previous visit at university gender identity clinic                                                                                                                                 |
| Dhejne et al., 2011                     | Gender identity    | Proxy                                  | At least one inpatient diagnosis of gender identity disorder without concomitant psychiatric diagnosis and at least one discrepancy between gender variables in selected registries |
| Dinno 2017                              | Gender identity    | Proxy                                  | Identity stated in media reports                                                                                                                                                    |
| Erlangsen et al., 2020                  | Sexual orientation | Proxy                                  | Registered same-sex marriage                                                                                                                                                        |
| Erlangsen et al., 2023                  | Gender identity    | Proxy                                  | Based on transgender-related diagnostic codes, recorded legal change of gender, or both                                                                                             |
| Everett, Wall, Shea & Hughes, 2021      | Sexual orientation | Self-reported identity                 | Presumed sexual minority identity due to enrollment in longitudinal study of sexual minority women which required prior self-report of minoritized sexual identity                  |
| Feigelman, Ploderl, Rosen & Cerel, 2019 | Sexual orientation | Self-reported behavior                 | Sex of partners in both the past 12 months and the past 5 years or same-sex romantic attraction                                                                                     |
| Frisch & Brønnum-Hansen, 2009           | Sexual orientation | Proxy                                  | Registered same-sex marriage                                                                                                                                                        |
| Frisch & Simonsen, 2013                 | Sexual orientation | Proxy                                  | Current or former registered same-sex marriage                                                                                                                                      |
| Hughes et al., 2022a                    | Gender identity    | Proxy                                  | Based on presence of International Classification of Disease (ICD-9 and ICD-10) codes specific to trans individuals in insurance claims                                             |
| Hughes et al., 2022b                    | Gender identity    | Proxy                                  | Based on presence of International Classification of Disease (ICD-9 and ICD-10) codes specific to trans individuals in insurance claims                                             |
| Jackson et al., 2023                    | Gender identity    | Proxy                                  | Diagnosis codes for gender incongruence                                                                                                                                             |

(Continued)



Table 4. (Continued)

| Study                                          | SO or GI or both?  | Proxy or self-report                   | Measure of SOGI                                                                                                                                                                                                       |
|------------------------------------------------|--------------------|----------------------------------------|-----------------------------------------------------------------------------------------------------------------------------------------------------------------------------------------------------------------------|
| Koblin et al., 1992                            | Sexual orientation | Not specified                          | Not specified—report only recruitment from clinics serving homosexual men, gay organizations, bathhouses, and residence in areas of New York City where large numbers of homosexual men lived during the study period |
| Laughney & Eliason, 2022                       | Sexual orientation | Self-reported identity and/or behavior | History of same-sex sexual partners or identification as homosexual/gay, homosexual/lesbian, or bisexual                                                                                                              |
| Lehavot et al., 2016                           | Sexual orientation | Self-reported behavior                 | Sex of sexual partners over adult lifetime                                                                                                                                                                            |
| Lindström & Rosvall, 2020                      | Sexual orientation | Self-reported identity                 | Self-identification as heterosexual, bisexual, homosexual, or other                                                                                                                                                   |
| Lynch et al., 2020                             | Sexual orientation | Proxy                                  | Based on presence of International Classification of Disease (ICD-9 and ICD-10) codes related to sexual orientation in medical records and clinical notes                                                             |
| Lynch et al., 2022                             | Sexual orientation | Proxy                                  | Documentation of minoritized sexual orientation within text or administrative codes in medical records                                                                                                                |
| Martin, Cloninger, Guze & Clayton, 1985        | Sexual orientation | Proxy                                  | Index diagnosis of homosexuality                                                                                                                                                                                      |
| Mathy, Cochran, Olsen & Mays, 2011             | Sexual orientation | Proxy                                  | Current or past same-sex registered domestic partnership                                                                                                                                                              |
| Mize & Shackelford, 2008                       | Sexual orientation | Proxy                                  | Recorded as homosexual relationship in homicide database                                                                                                                                                              |
| Moore et al., 2023                             | Sexual orientation | Self-reported identity and/or behavior | Self-identification as heterosexual or straight, homosexual or gay, or bisexual, or indication of positive lifetime histories of same-sex sexual partners                                                             |
| Ndimbie et al., 1994                           | Sexual orientation | Self-report—non-specific               | Presumed sexual minority identity due to prior enrollment in epidemiologic study with homosexual and bisexual male subjects                                                                                           |
| O'Driscoll et al., 2001                        | Sexual orientation | Self-reported identity                 | Self-identification as sexual minority                                                                                                                                                                                |
| Passaro et al., 2019                           | Sexual orientation | Not specified                          | Not specified—report only recruitment from community venues serving gay and bisexual men and media outlets                                                                                                            |
| Ream, 2019                                     | Both               | Proxy                                  | NVDRS indicators for sex, sexual orientation, and transgender status                                                                                                                                                  |
| Salway et al., 2022                            | Sexual orientation | Self-reported identity                 | Self-identification as heterosexual, homosexual or bisexual                                                                                                                                                           |
| van Kesteren, Asscheman, Megens & Gooren, 1997 | Gender identity    | Proxy                                  | Presence of reported “problem of gender dysphoria” in outpatient clinic records                                                                                                                                       |
| Wiepjes et al., 2020                           | Gender identity    | Proxy                                  | Previous visit to gender dysphoria clinic                                                                                                                                                                             |

<https://doi.org/10.1371/journal.pone.0307688.t004>

sizes that reduced statistical power. Of the 43 studies, 42 indicated higher SGM mortality for at least one cause of death; however, of those 43 studies, 28 studies included null findings for other causes of death and/or included findings that some SGM groups had reduced mortality risk for at least one cause of death (e.g., intimate partner homicide among lesbian couples, all-cause mortality among transgender patients aged 40–64) [61, 81]. Across studies, notable variation in methods of SOGI measurement, use of SOGI proxies, mortality risk measurement, and data sources hampered study quality.

The operationalization of SOGI measures continues to vex health equity researchers, with the National Academies of Science, Engineering, and Medicine (NASEM) issuing its inaugural attempt in 2022 at guiding data collection in the U.S. [83]. However, this guidance does not include the particular data collection used in mortality surveillance. Efforts have been underway to develop and test training for medicolegal death investigators to include SOGI as standard elements in their investigations of external causes of death (e.g., unintentional and intentional injuries) [37, 84]. However, natural causes of death do not frequently involve investigation or autopsies, thus it is unclear how best to assure documentation of SOGI in case of



non-violent deaths, which constitute most deaths in the U.S. Although the NVDRS includes standardized SOGI fields, approximately 4 of 5 cases are missing SOGI data [37]. Consequently, the piecemeal fashion of SOGI definitions revealed in this review underscore the need for efforts to guide data collection in the unique context of mortality. Moreover, the disunity of definitions across studies diminished our confidence in applying meta-analysis because of the risks of population misclassification across studies (e.g., relying solely on data from married/partnered couples, medical record data that defined transgender status through ICD codes).

Expanding on this latter point, with the lack of systematic, consistent, and valid SOGI measures in mortality surveillance, studies included in the current review relied on a variety of SOGI proxies, including same-sex marriage, domestic partnership, and cohabitation, same-sex sexual behavior, and clinical histories of gender dysphoria diagnosis or gender affirming hormone therapy. These proxies overlook unmarried, single, and clinically unengaged SGM people and may result in assuming identity from behavior, risking erasure of bisexual and nonbinary groups, SGM people who lack healthcare access, and people who are not “out” as SGM. In fact, most studies that met inclusion criteria for this review focused on gay and lesbian mortality, and many of those studies relied on same-sex marriage and domestic partnership as proxy measures of sexual orientation. The use of such proxies may help explain why only a few studies in this review specifically provided bisexual mortality statistics, despite decades of research indicating that bisexual people are uniquely burdened by health disparities when compared to gay and lesbian people [85]. Most of the studies of transgender mortality relied on clinical cohorts using proxies for study inclusion, such as ICD-9 diagnostic codes or cross-sex hormone treatment. Such methods exclude non-clinically-engaged transgender and nonbinary people. For example, in the U.S. upwards of 33% of transgender people, generally, and 69% of nonbinary people, specifically, are not enrolled gender-related clinical care, such that a reliance on clinical care for study enrollment may specifically undercount nonbinary populations [86].

Most of the studies in this review focused on all-cause and suicide mortality. Far fewer studies examined specific causes like cancer, drug overdose, and homicide. Future research should also explore links between established disparities in smoking and potential increased cancer and cardiovascular disease mortality among SGM people [87]. Given the recent and ongoing opioid epidemic in the U.S, studies of mortality disparity by overdose may be useful to guiding substance use intervention with SGM people. For example, a recent study of VA patient records found that transgender patients had over twice the risk of opioid poisoning than cisgender patients [88]. Furthermore, studies on homicide may be particularly relevant and needed considering recent grassroots movements to combat hate violence and homicide of trans women of color, specifically [89–92]. Transgender individuals have greater risks of intimate partner violence (IPV) than their cisgender peers, a finding replicated across geography, including Haiti, Australia, China, and Brazil. IPV is a major risk factor for premature mortality, especially intimate partner homicide [93–97].

In addition to limitations in assessment of SOGI information across studies and limited scope of causes of death, several other limitations should be considered when interpreting conclusions of this systematic review. Notably, the HIV/AIDS epidemic has been a major cause of mortality for gay and bisexual men and transgender people for decades. This review excluded studies entirely focused on HIV/AIDS clinical and cohort samples to reduce population-level bias in mortality data and potential confounding effects of historical events related to HIV/AIDS treatment and mortality (e.g., introduction of antiretroviral therapy). Because studies on HIV/AIDS cohorts were excluded, the present study is limited in its ability to illuminate the impacts of HIV/AIDS to patterns of mortality among SGM people, although all-cause

mortality may be elevated for SGM people with HIV/AIDS. For example, in addition to reductions in life expectancy related to HIV/AIDS among these cohorts, research suggests that disparities in other causes of death (e.g., suicide deaths) may be exacerbated among people living with HIV/AIDS [98, 99].

The results of the review were limited to its search terms, databases (APA, CINAHL, Health Source, Health Policy Reference Center, LGBTQ+ Source, Social Sciences Full Text, MedLine and PubMed), the use of controlled vocabularies over text word searching and each databases' indexing procedures; it is possible that relevant studies may have eluded the search due to not matching search terms, being written in languages other than English, being published in journals which were not indexed in our chosen databases, or not being peer-reviewed. Additional sources of data (e.g., grey literature) may provide additional insight into mortality disparities for SGM people and should be considered in future research.

Although the review aimed to achieve a global synthesis of SGM mortality data, only studies from North American and European nations met criteria for inclusion. Although disparities in mortality for SGM people are a global issue, we are unable to comment on global patterns due to the absence of comparative mortality studies from South America, Asia, Africa and Oceania in this review. Recent studies suggest that researchers are leading efforts toward understanding SGM mortality in nations where population data on SOGI are unavailable [100–102]. A few studies from nations without population SOGI data were coded as part of our systematic review, but were ultimately excluded due to not meeting inclusion criteria for study design (e.g., online media reports, case studies) or for lacking a non-SGM comparator. However, these studies provide valuable insight about cultural differences which may be associated with mortality risk for SGM people, including each nation's social norms and legal protections (e.g., social exclusion and homicide of transgender people in Pakistan) [102]. For example, in their study of Tokyo suicides from 2009–2018, Sakai and colleagues compared correlates of suicide, such as means of suicide (e.g., hanging, fall, poison) and mental health diagnoses, for LGBT and non-LGBT populations. Though excluded from this study for not providing overall suicide rate outcomes for LGBT and non-LGBT populations, this work emphasized population differences in predictors of and methods by which suicide occurs in Tokyo that may can inform future public health efforts and research [101]. In an example from India, which was excluded for not reporting a mortality rate outcome, researchers identified that news reports of LGBTQI+ suicide largely covered transgender suicides, often included derogatory terminology (especially when written in a local language), and rarely included educational information on suicide prevention [100]. In addition to limited representation of SGM mortality data globally, methods in the sampled literature notably differed by nationality. Many Northern European studies benefitted from national and civil registries that collected SOGI data, therefore having a greater impact on our findings compared to studies from nations that do not collect SOGI in administrative data.

Although a few included studies examined differential outcomes based on racial and ethnic identity, intersectional approaches were not largely adopted across studies [66, 82]. Therefore, it remains difficult to ascertain how mortality metrics may differ when accounting for multiple marginalization, including marginalization due to diverse racial and ethnic identities and marginalization due to plurisexual identities (e.g., bisexual+). Examining mortality disparities through an intersectional lens is an important direction for exploration in future research. Additionally, several US studies utilized samples of SGM veterans, who may not be representative of non-veteran SGM due to potential additional mortality risks conferred by stressors unique to veteran populations [56]. Each of these limitations may impact generalizability of the findings to other SGM people.

Clarifying the findings from this systematic review requires strengthening mortality surveillance to include SOGI information about decedents on a global scale, which could be achieved in several ways. Enhancing collection of SOGI information across public health surveillance systems, including governmental and municipal health surveys, medical records and hospital systems, and administrative databases, creates opportunities to merge those data with mortality records. Continuing non-collection of SOGI data inhibits meaningful efforts to address social determinants of health through public health policy and programming [103]. Indeed, recent policy efforts in the U.S. (e.g., LGBTQI+ Data Inclusion Act) have aimed to address this need in federal surveys. Researchers in New Zealand constructed a conceptual plan for integration of sexual orientation into governmental statistics systems, presumably including mortality data, and highlighted the importance of cultural relevance of data collection, such as terms and phrases for sexual orientation concepts among indigenous communities [104]. Relatedly, funding for implementation and evaluation of data collection methods is also of great importance because SOGI may have differential response based on demographics (e.g., native/preferred language) and because the constructs of sexual orientation and gender identity are temporally specific and develop over time [105].

In sum, this review offers tentative support that SGM people face unique increased mortality risk compared to heterosexual and cisgender people. Most studies supported the existence of all-cause or cause-specific mortality disparities burdening SGM people. In many studies, one or more subgroups of SGM populations exhibited higher risk of all-cause or cause-specific mortality; future research can examine subsample-specific and cause-specific mortality risks. Further research is needed to work towards harmonizing operationalization and measurement of SOGI to enable meta-analysis, specifically attending to the threats of misclassification and non-representativeness of SGM groups across research designs. Study findings strongly indicate the need to increase rigor and harmonize measures to facilitate more accurate population SOGI mortality assessment. Clear identification of mortality disparities and understanding of mortality risk associated with certain causes of death (e.g., lung cancer) among SGM people is needed to inform targeted public health prevention and medical intervention efforts with SGM people. Studies in this review indicate the need for more population-level research on all-cause and cause-specific SGM mortality risk, with a focus on suicide, homicide, cardiovascular disease, drug overdose, infectious and parasitic diseases, and cancer. More notably, to improve population health equity, findings indicate the need for SOGI data collection in public health surveillance and further research on bisexual, transgender, and nonbinary population health.

## Supporting information

**S1 Table. Search strategy.**

(DOCX)

**S2 Table. PRISMA checklist.**

(DOC)

## Acknowledgments

We acknowledge Jade Winn (University of Southern California) for providing recommendations and guidance with the Covidence program, as well as search term and database selection.

## Author Contributions

**Conceptualization:** Corinne E. Zachry, Rory P. O'Brien, Kirsty A. Clark, John R. Blosnich.

**Data curation:** Corinne E. Zachry, Rory P. O'Brien, John R. Blosnich.

**Formal analysis:** Corinne E. Zachry, Rory P. O'Brien.

**Funding acquisition:** John R. Blosnich.

**Investigation:** Corinne E. Zachry, Rory P. O'Brien, Marissa L. Ding, John R. Blosnich.

**Methodology:** Corinne E. Zachry, Rory P. O'Brien, John R. Blosnich.

**Project administration:** Corinne E. Zachry.

**Resources:** Corinne E. Zachry, Rory P. O'Brien.

**Supervision:** John R. Blosnich.

**Writing – original draft:** Corinne E. Zachry, Rory P. O'Brien, Kirsty A. Clark, John R. Blosnich.

**Writing – review & editing:** Corinne E. Zachry, Rory P. O'Brien, Kirsty A. Clark, Marissa L. Ding, John R. Blosnich.

## References

1. Institute of Medicine (US) Committee on Lesbian, Gay, Bisexual, and Transgender Health Issues and Research Gaps and Opportunities. The Health of Lesbian, Gay, Bisexual, and Transgender People: Building a Foundation for Better Understanding. 2011.
2. National Academies of Sciences, Engineering, and Medicine. DoD, Education, DoB, Sa, Population, Co, Populations, Co, UtW-BoSaGD. Understanding the Well-Being of LGBTQ+ Populations. 2020.
3. Patterson JG, Jabson JM, Bowen DJ. Measuring Sexual and Gender Minority Populations in Health Surveillance. *LGBT Health*. 2017 Apr; 4(2):82–105. <https://doi.org/10.1089/lgbt.2016.0026> PMID: 28287877. PMCID: PMC5404274. Epub 20170313. eng.
4. Blosnich JR. Interpersonal and self-directed violence among sexual and gender minority populations: Moving research from prevalence to prevention. *Curr Epidemiol Rep*. 2022 Sep; 9(3):142–60. <https://doi.org/10.1007/s40471-022-00299-4> PMID: 36845319. PMCID: PMC9957556. Epub 20220721. eng.
5. Gmelin JH, De Vries YA, Baams L, Aguilar-Gaxiola S, Alonso J, Borges G, et al. Increased risks for mental disorders among LGB individuals: cross-national evidence from the World Mental Health Surveys. *Soc Psychiatry Psychiatr Epidemiol*. 2022 Nov; 57(11):2319–32. <https://doi.org/10.1007/s00127-022-02320-z> PMID: 35851652. PMCID: PMC9636102. Epub 20220719. eng.
6. Blosnich J, Lee JG, Horn K. A systematic review of the aetiology of tobacco disparities for sexual minorities. *Tob Control*. 2013 Mar; 22(2):66–73. <https://doi.org/10.1136/tobaccocontrol-2011-050181> PMID: 22170335. PMCID: PMC3779881. Epub 20111214. eng.
7. Hottes TS, Bogaert L, Rhodes AE, Brennan DJ, Gesink D. Lifetime Prevalence of Suicide Attempts Among Sexual Minority Adults by Study Sampling Strategies: A Systematic Review and Meta-Analysis. *Am J Public Health*. 2016 May; 106(5):e1–12. <https://doi.org/10.2105/AJPH.2016.303088> PMID: 27049424. PMCID: PMC4985071. eng.
8. Brooks VR. *Minority stress and lesbian women* Lexington, MA: Lexington Books; 1981.
9. Meyer IH. Prejudice, social stress, and mental health in lesbian, gay, and bisexual populations: conceptual issues and research evidence. *Psychol Bull*. 2003 Sep; 129(5):674–97. <https://doi.org/10.1037/0033-2909.129.5.674> PMID: 12956539. PMCID: PMC2072932. eng.
10. Thoma BC, Eckstrand KL, Montano GT, Rezeppa TL, Marshal MP. Gender Nonconformity and Minority Stress Among Lesbian, Gay, and Bisexual Individuals: A Meta-Analytic Review. *Perspect Psychol Sci*. 2021 Nov; 16(6):1165–83. <https://doi.org/10.1177/1745691620968766> PMID: 33645322. PMCID: PMC7646043. Epub 20210301. eng.
11. Li M, Chau K, Calabresi K, Wang Y, Wang J, Fritz J, et al. The Effect of Minority Stress Processes on Smoking for Lesbian, Gay, Bisexual, Transgender, and Queer Individuals: A Systematic Review. *LGBT Health*. 2024 Apr 01. <https://doi.org/10.1089/lgbt.2022.0323> PMID: 38557209. Epub 20240401. eng.

12. de Lange J, Baams L, van Bergen DD, Bos HMW, Bosker RJ. Minority Stress and Suicidal Ideation and Suicide Attempts Among LGBT Adolescents and Young Adults: A Meta-Analysis. *LGBT Health*. 2022; 9(4):222–37. <https://doi.org/10.1089/lgbt.2021.0106> PMID: 35319281. Epub 20220318. eng.
13. Hatzenbuehler ML, Pachankis JE. Stigma and Minority Stress as Social Determinants of Health Among Lesbian, Gay, Bisexual, and Transgender Youth: Research Evidence and Clinical Implications. *Pediatr Clin North Am*. 2016 Dec; 63(6):985–97. <https://doi.org/10.1016/j.pcl.2016.07.003> PMID: 27865340. Epub 20161012. eng.
14. Andersen JP, Blosnich J. Disparities in adverse childhood experiences among sexual minority and heterosexual adults: results from a multi-state probability-based sample. *PLoS One*. 2013; 8(1): e54691. <https://doi.org/10.1371/journal.pone.0054691> PMID: 23372755. PMCID: PMC3553068. Epub 20130123. eng.
15. Morton MH, Dworsky A, Matjasko JL, Curry SR, Schlueter D, Chávez R, et al. Prevalence and Correlates of Youth Homelessness in the United States. *J Adolesc Health*. 2018 Jan; 62(1):14–21. <https://doi.org/10.1016/j.jadohealth.2017.10.006> PMID: 29153445. PMCID: PMC5826721. Epub 20171115. eng.
16. Bender AK, Lauritsen JL. Violent Victimization Among Lesbian, Gay, and Bisexual Populations in the United States: Findings From the National Crime Victimization Survey, 2017–2018. *Am J Public Health*. 2021 Feb; 111(2):318–26. <https://doi.org/10.2105/AJPH.2020.306017> PMID: 33351656. PMCID: PMC7811079. Epub 20201222.
17. Patterson JG, Russomanno J, Jabson Tree JM. Sexual orientation disparities in food insecurity and food assistance use in U.S. adult women: National Health and Nutrition Examination Survey, 2005–2014. *BMC Public Health*. 2020 Aug 13; 20(1):1155. <https://doi.org/10.1186/s12889-020-09261-9> PMID: 32787863. PMCID: PMC7425068. Epub 20200813. eng.
18. L BMV K CS, WBD M. *LGBT poverty in the United States: A study of differences between sexual orientation and gender identity groups*. Los Angeles, CA: The Williams Institute; 2019.
19. Flentje A, Heck NC, Brennan JM, Meyer IH. The relationship between minority stress and biological outcomes: A systematic review. *J Behav Med*. 2020 Oct; 43(5):673–94. <https://doi.org/10.1007/s10865-019-00120-6> PMID: 31863268. PMCID: PMC7430236. Epub 20191220. eng.
20. Blosnich JR, Cassese EC, Friedman MR, Coulter RWS, Sang JM, Matthews DD, et al. Religious freedom restoration acts and sexual minority population health in the United States. *Am J Orthopsychiatry*. 2019; 89(6):675–81. <https://doi.org/10.1037/ort0000349> PMID: 30247051. PMCID: PMC6431586. Epub 20180924. eng.
21. Mahapatra P, Shibuya K, Lopez AD, Coullare F, Notzon FC, Rao C, et al. Civil registration systems and vital statistics: successes and missed opportunities. *Lancet*. 2007 Nov 10; 370(9599):1653–63. [https://doi.org/10.1016/S0140-6736\(07\)61308-7](https://doi.org/10.1016/S0140-6736(07)61308-7) PMID: 18029006. eng.
22. Mikkelsen L, Phillips DE, AbouZahr C, Setel PW, de Savigny D, Lozano R, et al. A global assessment of civil registration and vital statistics systems: monitoring data quality and progress. *Lancet*. 2015 Oct 03; 386(10001):1395–406. [https://doi.org/10.1016/S0140-6736\(15\)60171-4](https://doi.org/10.1016/S0140-6736(15)60171-4) PMID: 25971218. Epub 20150510. eng.
23. Phelan JC, Link BG, Diez-Roux A, Kawachi I, Levin B. "Fundamental causes" of social inequalities in mortality: a test of the theory. *J Health Soc Behav*. 2004 Sep; 45(3):265–85. <https://doi.org/10.1177/002214650404500303> PMID: 15595507. eng.
24. Morrison DS. Homelessness as an independent risk factor for mortality: results from a retrospective cohort study. *Int J Epidemiol*. 2009 Jun; 38(3):877–83. <https://doi.org/10.1093/ije/dyp160> PMID: 19304988. Epub 20090321. eng.
25. Feodor Nilsson S, Laursen TM, Hjorthøj C, Nordentoft M. Homelessness as a predictor of mortality: an 11-year register-based cohort study. *Soc Psychiatry Psychiatr Epidemiol*. 2018 Jan; 53(1):63–75. <https://doi.org/10.1007/s00127-017-1456-z> PMID: 29124292. Epub 20171109. eng.
26. Cusack M, Montgomery A, Cashy J, Dichter M, Byrne T, Blosnich J. Examining veteran housing instability and mortality by homicide, suicide, and unintentional injury. *Journal of Social Distress and the Homeless*. 2021 JUL 3 2021; 30(2):174–80. PubMed PMID: WOS:000555648200001. English.
27. Carter SP, Montgomery AE, Henderson ER, Ketterer B, Dichter M, Gordon AJ, et al. Housing Instability Characteristics Among Transgender Veterans Cared for in the Veterans Health Administration, 2013–2016. *Am J Public Health*. 2019 Oct; 109(10):1413–8. <https://doi.org/10.2105/AJPH.2019.305219> PMID: 31415197. PMCID: PMC6727297. Epub 20190815. eng.
28. Petry L, Hill C, Milburn N, Rice E. Who Is Couch-Surfing and Who Is on the Streets? Disparities Among Racial and Sexual Minority Youth in Experiences of Homelessness. *J Adolesc Health*. 2022 May; 70(5):743–50. <https://doi.org/10.1016/j.jadohealth.2021.10.039> PMID: 35074279. Epub 20220122. eng.



29. Corliss HL, Goodenow CS, Nichols L, Austin SB. High burden of homelessness among sexual-minority adolescents: findings from a representative Massachusetts high school sample. *Am J Public Health*. 2011 Sep; 101(9):1683–9. <https://doi.org/10.2105/AJPH.2011.300155> PMID: 21778481. PMCID: PMC3154237. Epub 20110721. eng.
30. Brown DW, Anda RF, Tiemeier H, Felitti VJ, Edwards VJ, Croft JB, et al. Adverse childhood experiences and the risk of premature mortality. *Am J Prev Med*. 2009 Nov; 37(5):389–96. <https://doi.org/10.1016/j.amepre.2009.06.021> PMID: 19840693. eng.
31. Kelly-Irving M, Lepage B, Dedieu D, Bartley M, Blane D, Grosclaude P, et al. Adverse childhood experiences and premature all-cause mortality. *Eur J Epidemiol*. 2013 Sep; 28(9):721–34. <https://doi.org/10.1007/s10654-013-9832-9> PMID: 23887883. PMCID: PMC3787798. Epub 20130726. eng.
32. Austin A, Herrick H, Proescholdbell S. Adverse Childhood Experiences Related to Poor Adult Health Among Lesbian, Gay, and Bisexual Individuals. *Am J Public Health*. 2016 Feb; 106(2):314–20. <https://doi.org/10.2105/AJPH.2015.302904> PMID: 26691127. PMCID: PMC4815563. Epub 20151221. eng.
33. Bosnich JR, Andersen JP. Thursday's child: the role of adverse childhood experiences in explaining mental health disparities among lesbian, gay, and bisexual U.S. adults. *Soc Psychiatry Psychiatr Epidemiol*. 2015 Feb; 50(2):335–8. <https://doi.org/10.1007/s00127-014-0955-4> PMID: 25367679. PMCID: PMC4512235. Epub 20141104. eng.
34. Jonas L, Salazar de Pablo G, Shum M, Nosarti C, Abbott C, Vaquerizo-Serrano J. A systematic review and meta-analysis investigating the impact of childhood adversities on the mental health of LGBT+ youth. *JCPP Adv*. 2022 Jun; 2(2):e12079. <https://doi.org/10.1002/jcv2.12079> PMID: 37431452. PMCID: PMC10242973. Epub 20220510. eng.
35. Merrick MT, Ford DC, Ports KA, Guinn AS. Prevalence of Adverse Childhood Experiences From the 2011–2014 Behavioral Risk Factor Surveillance System in 23 States. *JAMA Pediatr*. 2018 Nov 01; 172(11):1038–44. <https://doi.org/10.1001/jamapediatrics.2018.2537> PMID: 30242348. PMCID: PMC6248156. eng.; Correction In: Transposed Row Labels and Data in Table. *JAMA Pediatr*. 2018;172(11):1104.
36. MacDorman MF, Thoma M, Declercq E, Howell EA. Racial and Ethnic Disparities in Maternal Mortality in the United States Using Enhanced Vital Records, 2016–2017. *Am J Public Health*. 2021 Sep; 111(9):1673–81. <https://doi.org/10.2105/AJPH.2021.306375> PMID: 34383557. PMCID: PMC8563010. Epub 20210812. eng.
37. Haas AP, Lane AD, Bosnich JR, Butcher BA, Mortali MG. Collecting Sexual Orientation and Gender Identity Information at Death. *Am J Public Health*. 2019 Feb; 109(2):255–9. <https://doi.org/10.2105/AJPH.2018.304829> PMID: 30571294. PMCID: PMC6336043. Epub 20181220. eng.
38. Clark KA, Bosnich JR, Haas AP, Cochran SD. Estimate of Lesbian, Gay, Bisexual, and Transgender Youth Suicide Is Inflated. *J Adolesc Health*. 2019 Jun; 64(6):810. <https://doi.org/10.1016/j.jadohealth.2019.03.003> PMID: 31122510. PMCID: PMC7422953. eng.
39. Ream GL. What's Unique About Lesbian, Gay, Bisexual, and Transgender (LGBT) Youth and Young Adult Suicides? Findings From the National Violent Death Reporting System. *J Adolesc Health*. 2019 May; 64(5):602–7. <https://doi.org/10.1016/j.jadohealth.2018.10.303> PMID: 30711364. Epub 20190131. eng.
40. Cochran SD, Björkenstam C, Mays VM. Sexual Orientation and All-Cause Mortality Among US Adults Aged 18 to 59 Years, 2001–2011. *Am J Public Health*. 2016 May; 106(5):918–20. <https://doi.org/10.2105/AJPH.2016.303052> PMID: 26985610. PMCID: PMC4985116. Epub 20160317. eng.
41. Cochran SD, Mays VM. Mortality risks among persons reporting same-sex sexual partners: evidence from the 2008 General Social Survey-National Death Index data set. *Am J Public Health*. 2015 Feb; 105(2):358–64. <https://doi.org/10.2105/AJPH.2014.301974> PMID: 25033136. PMCID: PMC4289448. eng.
42. Mathy RM, Cochran SD, Olsen J, Mays VM. The association between relationship markers of sexual orientation and suicide: Denmark, 1990–2001. *Soc Psychiatry Psychiatr Epidemiol*. 2011 Feb; 46(2):111–7. <https://doi.org/10.1007/s00127-009-0177-3> PMID: 20033129. PMCID: PMC3034881. Epub 20091224. eng.
43. Bosnich JR, Brown GR, Wojcio S, Jones KT, Bossarte RM. Mortality Among Veterans with Transgender-Related Diagnoses in the Veterans Health Administration, FY2000–2009. *LGBT Health*. 2014 Dec; 1(4):269–76. <https://doi.org/10.1089/lgbt.2014.0050> PMID: 26789855. eng.
44. Björkenstam C, Andersson G, Dalman C, Cochran S, Kosidou K. Suicide in married couples in Sweden: Is the risk greater in same-sex couples? *Eur J Epidemiol*. 2016 Jul; 31(7):685–90. <https://doi.org/10.1007/s10654-016-0154-6> PMID: 27168192. PMCID: PMC6889060. Epub 20160511. eng.
45. Dataline NCHS. Public Health Reports. 2011; 126(1):136–8.

46. Rosenfeld D, Bartlam B, Smith RD. Out of the closet and into the trenches: gay male Baby Boomers, aging, and HIV/AIDS. *Gerontologist*. 2012 Apr; 52(2):255–64. <https://doi.org/10.1093/geront/gnr138> PMID: 22298746. Epub 20120131. eng.
47. Stutterheim SE, van Dijk M, Wang H, Jonas KJ. The worldwide burden of HIV in transgender individuals: An updated systematic review and meta-analysis. *PLoS One*. 2021; 16(12):e0260063. <https://doi.org/10.1371/journal.pone.0260063> PMID: 34851961. PMCID: PMC8635361. Epub 20211201. eng.
48. Page MJ, McKenzie JE, Bossuyt PM, Boutron I, Hoffmann TC, Mulrow CD, et al. The PRISMA 2020 statement: an updated guideline for reporting systematic reviews. *BMJ*. 2021 Mar 29; 372:n71. <https://doi.org/10.1136/bmj.n71> PMID: 33782057. PMCID: PMC8005924. Epub 20210329. eng.
49. Study Quality Assessment Tools.: National Heart, Lung, and Blood institute.
50. Martin RL, Cloninger CR, Guze SB, Clayton PJ. Mortality in a follow-up of 500 psychiatric outpatients. I. Total mortality. *Arch Gen Psychiatry*. 1985 Jan; 42(1):47–54. <https://doi.org/10.1001/archpsyc.1985.01790240049005> PMID: 3966852. eng.
51. Dhejne C, Lichtenstein P, Boman M, Johansson AL, Långström N, Landén M. Long-term follow-up of transsexual persons undergoing sex reassignment surgery: cohort study in Sweden. *PLoS One*. 2011 Feb 22; 6(2):e16885. <https://doi.org/10.1371/journal.pone.0016885> PMID: 21364939. PMCID: PMC3043071. Epub 20110222. eng.
52. Erlangsen A, Jacobsen AL, Ranning A, Delamare AL, Nordentoft M, Frisch M. Transgender Identity and Suicide Attempts and Mortality in Denmark. *JAMA*. 2023 Jun 27; 329(24):2145–53. <https://doi.org/10.1001/jama.2023.8627> PMID: 37367977. PMCID: PMC10300682. eng.
53. Everett BG, Wall M, Shea E, Hughes TL. Mortality risk among a sample of sexual minority women: A focus on the role of sexual identity disclosure. *Soc Sci Med*. 2021 Mar; 272:113731. <https://doi.org/10.1016/j.socscimed.2021.113731> PMID: 33578310. PMCID: PMC8022871. Epub 20210130. eng.
54. Frisch M, Brønnum-Hansen H. Mortality among men and women in same-sex marriage: a national cohort study of 8333 Danes. *Am J Public Health*. 2009 Jan; 99(1):133–7. <https://doi.org/10.2105/AJPH.2008.133801> PMID: 19008504. PMCID: PMC2636618. Epub 20081113. eng.
55. Koblin BA, Morrison JM, Taylor PE, Stoneburner RL, Stevens CE. Mortality trends in a cohort of homosexual men in New York City, 1978–1988. *Am J Epidemiol*. 1992 Sep 15; 136(6):646–56. <https://doi.org/10.1093/oxfordjournals.aje.a116544> PMID: 1442731. eng.
56. Lynch KE, Gatsby E, Viernes B, Schliep KC, Whitcomb BW, Alba PR, et al. Evaluation of Suicide Mortality Among Sexual Minority US Veterans From 2000 to 2017. *JAMA Netw Open*. 2020 Dec 01; 3(12):e2031357. <https://doi.org/10.1001/jamanetworkopen.2020.31357> PMID: 33369662. PMCID: PMC7770555. Epub 20201201. eng.
57. Passaro RC, Ramsey K, Segura ER, Lake JE, Reback CJ, Clark JL, et al. Speed kills: Associations between methamphetamine use, HIV infection, tobacco use, and accelerated mortality among gay and bisexual men in Los Angeles, CA 20years after methamphetamine dependence treatment. *Drug Alcohol Depend*. 2019 Feb 01; 195:164–9. <https://doi.org/10.1016/j.drugalcdep.2018.06.036> PMID: 30429048. PMCID: PMC6512788. Epub 20181111. eng.
58. Asscheman H, Gooren LJ, Eklund PL. Mortality and morbidity in transsexual patients with cross-gender hormone treatment. *Metabolism*. 1989 Sep; 38(9):869–73. [https://doi.org/10.1016/0026-0495\(89\)90233-3](https://doi.org/10.1016/0026-0495(89)90233-3) PMID: 2528051. eng.
59. Asscheman H, Giltay EJ, Megens JA, de Ronde WP, van Trotsenburg MA, Gooren LJ. A long-term follow-up study of mortality in transsexuals receiving treatment with cross-sex hormones. *Eur J Endocrinol*. 2011 Apr; 164(4):635–42. <https://doi.org/10.1530/EJE-10-1038> PMID: 21266549. Epub 20110125. eng.
60. van Kesteren PJ, Asscheman H, Megens JA, Gooren LJ. Mortality and morbidity in transsexual subjects treated with cross-sex hormones. *Clin Endocrinol (Oxf)*. 1997 Sep; 47(3):337–42. <https://doi.org/10.1046/j.1365-2265.1997.2601068.x> PMID: 9373456. eng.
61. Boyer TL, Youk AO, Haas AP, Brown GR, Shipherd JC, Kauth MR, et al. Suicide, Homicide, and All-Cause Mortality Among Transgender and Cisgender Patients in the Veterans Health Administration. *LGBT Health*. 2021 Apr; 8(3):173–80. <https://doi.org/10.1089/lgbt.2020.0235> PMID: 33544021. Epub 20210205. eng.
62. Cochran SD, Mays VM. Sexual orientation and mortality among US men aged 17 to 59 years: results from the National Health and Nutrition Examination Survey III. *Am J Public Health*. 2011 Jun; 101(6):1133–8. <https://doi.org/10.2105/AJPH.2010.300013> PMID: 21493941. PMCID: PMC3093261. Epub 20110414. eng.
63. Cochran SD, Mays VM. Risk of breast cancer mortality among women cohabiting with same sex partners: findings from the National Health Interview Survey, 1997–2003. *J Womens Health (Larchmt)*. 2012 May; 21(5):528–33. <https://doi.org/10.1089/jwh.2011.3134> PMID: 22360695. PMCID: PMC3353824. Epub 20120223. eng.



64. Davis JM, Suleta K, Corsi KF, Booth RE. A Hazard Analysis of Risk Factors of Mortality in Individuals Who Inject Drugs in Denver CO. *AIDS Behav.* 2017 Apr; 21(4):1044–53. <https://doi.org/10.1007/s10461-016-1660-y> PMID: 28063072. PMCID: PMC5357437. eng.
65. Frisch M, Simonsen J. Marriage, cohabitation and mortality in Denmark: national cohort study of 6.5 million persons followed for up to three decades (1982–2011). *Int J Epidemiol.* 2013 Apr; 42(2):559–78. <https://doi.org/10.1093/ije/dyt024> PMID: 23482379. Epub 20130311. eng.
66. Hughes LD, King WM, Gamarel KE, Geronimus AT, Panagiotou OA, Hughto JMW. US Black-White Differences in Mortality Risk Among Transgender and Cisgender People in Private Insurance, 2011–2019. *Am J Public Health.* 2022 Oct; 112(10):1507–14. <https://doi.org/10.2105/AJPH.2022.306963> PMID: 35981277. PMCID: PMC9480456. Epub 20220818. eng.
67. Hughes LD, King WM, Gamarel KE, Geronimus AT, Panagiotou OA, Hughto JMW. Differences in All-Cause Mortality Among Transgender and Non-Transgender People Enrolled in Private Insurance. *Demography.* 2022 Jun 01; 59(3):1023–43. <https://doi.org/10.1215/00703370-9942002> PMID: 35548863. PMCID: PMC9195044. eng.
68. Jackson SS, Brown J, Pfeiffer RM, Shrewsbury D, O'Callaghan S, Berner AM, et al. Analysis of Mortality Among Transgender and Gender Diverse Adults in England. *JAMA Netw Open.* 2023 Jan 03; 6(1):e2253687. <https://doi.org/10.1001/jamanetworkopen.2022.53687> PMID: 36716027. PMCID: PMC9887492. Epub 20230103. eng.
69. Laughney CI, Eliason EL. Mortality Disparities Among Sexual Minority Adults in the United States. *LGBT Health.* 2022 Jan; 9(1):27–33. <https://doi.org/10.1089/lgbt.2020.0482> PMID: 34698549. Epub 20211025. eng.
70. Lehavot K, Rillamas-Sun E, Weitlauf J, Kimerling R, Wallace RB, Sadler AG, et al. Mortality in Postmenopausal Women by Sexual Orientation and Veteran Status. *Gerontologist.* 2016 Feb; 56 Suppl 1 (Suppl 1):S150–62. <https://doi.org/10.1093/geront/gnv125> PMID: 26768389. PMCID: PMC5881613. eng.
71. Lindström M, Rosvall M. Sexual orientation and all-cause mortality: A population-based prospective cohort study in southern Sweden. *Public Health Pract (Oxf).* 2020 Nov; 1:100032. <https://doi.org/10.1016/j.puhip.2020.100032> PMID: 36101682. PMCID: PMC9461313. Epub 20200712. eng.
72. Salway T, Rich AJ, Ferlatte O, Gesink D, Ross LE, Bränström R, et al. Preventable mortality among sexual minority Canadians. *SSM Popul Health.* 2022 Dec; 20:101276. <https://doi.org/10.1016/j.ssmph.2022.101276> PMID: 36337988. PMCID: PMC9634359. Epub 20221027. eng.
73. de Blok CJ, Wiepjes CM, van Velzen DM, Staphorsius AS, Nota NM, Gooren LJ, et al. Mortality trends over five decades in adult transgender people receiving hormone treatment: a report from the Amsterdam cohort of gender dysphoria. *Lancet Diabetes Endocrinol.* 2021 Oct; 9(10):663–70. [https://doi.org/10.1016/S2213-8587\(21\)00185-6](https://doi.org/10.1016/S2213-8587(21)00185-6) PMID: 34481559. Epub 20210902. eng.
74. O'Driscoll PT, McGough J, Hagan H, Thiede H, Critchlow C, Alexander ER. Predictors of accidental fatal drug overdose among a cohort of injection drug users. *Am J Public Health.* 2001 Jun; 91(6):984–7. <https://doi.org/10.2105/ajph.91.6.984> PMID: 11392946. PMCID: PMC1446480. eng.
75. Ndimbie OK, Perper JA, Kingsley L, Harty L, Winkelstein A. Sudden unexpected death in a male homosexual cohort. *Am J Forensic Med Pathol.* 1994 Sep; 15(3):247–50. <https://doi.org/10.1097/0000433-199409000-00013> PMID: 7825557. eng.
76. Alvarez-Hernandez LR, Mowbray O. Trends in Suicide Among Lesbian, Gay, and Bisexual Hispanic Individuals: National Violent Death Reporting System Data from 2012–2016. *J Homosex.* 2023 Jun 07; 70(7):1225–39. <https://doi.org/10.1080/00918369.2021.2018878> PMID: 34990312. Epub 20220106. eng.
77. Erlangsen A, Drefahl S, Haas A, Bjorkenstam C, Nordentoft M, Andersson G. Suicide among persons who entered same-sex and opposite-sex marriage in Denmark and Sweden, 1989–2016: a binational, register-based cohort study. *J Epidemiol Community Health.* 2020 Jan; 74(1):78–83. <https://doi.org/10.1136/jech-2019-213009> PMID: 31722984. PMCID: PMC6929702. Epub 20191113. eng.
78. Wiepjes CM, den Heijer M, Bremmer MA, Nota NM, de Blok CJM, Coumou BJG, et al. Trends in suicide death risk in transgender people: results from the Amsterdam Cohort of Gender Dysphoria study (1972–2017). *Acta Psychiatr Scand.* 2020 Jun; 141(6):486–91. <https://doi.org/10.1111/acps.13164> PMID: 32072611. PMCID: PMC7317390. Epub 20200312. eng.
79. Blosnich JR, Boyer TL, Brown GR, Kauth MR, Shipherd JC. Differences in Methods of Suicide Death Among Transgender and Nontransgender Patients in the Veterans Health Administration, 1999–2016. *Med Care.* 2021 Feb 01; 59:S31–S5. <https://doi.org/10.1097/MLR.0000000000001384> PMID: 33438880. eng.
80. Feigelman W, Plöderl M, Rosen Z, Cerel J. Research Note on Whether Sexual Minority Individuals Are Over-Represented Among Suicide's Casualties. *Crisis.* 2020 May; 41(3):229–32. <https://doi.org/10.1027/0227-5910/a000626> PMID: 31657644. Epub 20191028. eng.

81. Mize KD, Shackelford TK. Intimate partner homicide methods in heterosexual, gay, and lesbian relationships. *Violence Vict.* 2008; 23(1):98–114. <https://doi.org/10.1891/0886-6708.23.1.98> PMID: 18396584. eng.
82. Dinno A. Homicide Rates of Transgender Individuals in the United States: 2010–2014. *Am J Public Health.* 2017 Sep; 107(9):1441–7. <https://doi.org/10.2105/AJPH.2017.303878> PMID: 28727530. PMCID: PMC5551594. Epub 20170720. eng.
83. National Academies of Sciences E, and Medicine, Education DoBaSSa, Statistics CoN, Committee on Measuring Sex Gnl, and Sexual Orientation. *Measuring Sex, Gender Identity, and Sexual Orientation.* 2022.
84. Blossnich JR, Butcher BA, Mortali MG, Lane AD, Haas AP. Training Death Investigators to Identify Decedents' Sexual Orientation and Gender Identity: A Feasibility Study. *Am J Forensic Med Pathol.* 2022 Mar 01; 43(1):40–5. <https://doi.org/10.1097/PAF.0000000000000705> PMID: 34475319. PMCID: PMC8813878. eng.
85. Feinstein BA, Dyar C. Bisexuality, minority stress, and health. *Curr Sex Health Rep.* 2017 Mar; 9(1):42–9. <https://doi.org/10.1007/s11930-017-0096-3> PMID: 28943815. PMCID: PMC5603307. Epub 20170123. eng.
86. Kachen A, Pharr JR. Health Care Access and Utilization by Transgender Populations: A United States Transgender Survey Study. *Transgend Health.* 2020 Sep; 5(3):141–8. <https://doi.org/10.1089/trgh.2020.0017> PMID: 33644308. PMCID: PMC7906231. Epub 20200902. eng.
87. Caceres BA, Streed CG, Corliss HL, Lloyd-Jones DM, Matthews PA, Mukherjee M, et al. Assessing and Addressing Cardiovascular Health in LGBTQ Adults: A Scientific Statement From the American Heart Association. *Circulation.* 2020 Nov 10; 142(19):e321–e32. <https://doi.org/10.1161/CIR.0000000000000914> PMID: 33028085. PMCID: PMC8212867. Epub 20201008. eng.
88. Boyer TL, Blossnich JR, Hubbard CC, Sharp LK, Cashy JP, Suda KJ. Comparing Outpatient Opioids, High-Risk Prescribing, and Opioid Poisoning Between Transgender and Cisgender Veterans: A Cross-sectional Analysis. *Am J Prev Med.* 2022 Aug; 63(2):168–77. <https://doi.org/10.1016/j.amepre.2022.02.011> PMID: 35396161. Epub 20220405. eng.
89. Programs NCoA-V. *Hate Violence Against Transgender Communities.* 2013.
90. Foster N, Harper E, BT, Valentine TA, Richmond M, Willis R, et al. *Black Trans Women and Black Trans Femmes: Leading & Living Fiercely: Transgender Law Center; 2024* [Available from: <https://transgenderlawcenter.org/black-trans-women-black-trans-femmes-leading-living-fiercely/>].
91. Campaign HR. *Fatal Violence Against the Transgender and Gender-Expansive Community in 2023: Human Rights Campaign; 2024* [Available from: <https://www.hrc.org/resources/fatal-violence-against-the-transgender-and-gender-expansive-community-in-2023>].
92. Pulido M, Salcedo B, Plascencia-Juarez H, Landaverde S. #TransPolicyAgenda. *TransLatin@ Coalition; 2019.*
93. Zalla LC, Herce ME, Edwards JK, Michel J, Weir SS. The burden of HIV among female sex workers, men who have sex with men and transgender women in Haiti: results from the 2016 Priorities for Local AIDS Control Efforts (PLACE) study. *J Int AIDS Soc.* 2019 Jul; 22(7):e25281. <https://doi.org/10.1002/jia2.25281> PMID: 31287624. PMCID: PMC6615490. eng.
94. Spittal MJ, Fedyszyn I, Middleton A, Bassilios B, Gunn J, Woodward A, et al. Frequent callers to crisis helplines: who are they and why do they call? *Aust N Z J Psychiatry.* 2015 Jan; 49(1):54–64. <https://doi.org/10.1177/0004867414541154> PMID: 24972602. Epub 20140627. eng.
95. Zhang Y, Best J, Tang W, Tso LS, Liu F, Huang S, et al. Transgender sexual health in China: a cross-sectional online survey in China. *Sex Transm Infect.* 2016 Nov; 92(7):515–9. <https://doi.org/10.1136/sextrans-2015-052350> PMID: 27052037. PMCID: PMC5053843. Epub 20160406. eng.
96. De Boni RB, Machado IK, De Vasconcellos MTL, Hoagland B, Kallas EG, Madruga JV, et al. Syndemics among individuals enrolled in the PrEP Brasil Study. *Drug Alcohol Depend.* 2018 Apr 01; 185:168–72. <https://doi.org/10.1016/j.drugalcdep.2017.12.016> PMID: 29454927. Epub 20180210. eng.
97. Matias A, Gonçalves M, Soeiro C, Matos M. Intimate partner homicide: A meta-analysis of risk factors. *Aggression and Violent Behavior.* 2020 JAN-FEB 2020;50. PubMed PMID: WOS:000510528700014. English.
98. Pelton M, Ciarletta M, Wisnousky H, Lazzara N, Mangani M, Ba DM, et al. Rates and risk factors for suicidal ideation, suicide attempts and suicide deaths in persons with HIV: a systematic review and meta-analysis. *Gen Psychiatr.* 2021; 34(2):e100247. <https://doi.org/10.1136/gpsych-2020-100247> PMID: 33912798. PMCID: PMC8042999. Epub 20210409. eng.
99. Ferlatte O, Salway T, Oliffe JL, Trussler T. Stigma and suicide among gay and bisexual men living with HIV. *AIDS Care.* 2017 Nov; 29(11):1346–50. <https://doi.org/10.1080/09540121.2017.1290762> PMID: 28278571. Epub 20170210. eng.

100. Kar SK, Menon V, Mukherjee S, Bascarane S, Sharma G, Pattnaik JI, et al. Suicide reporting of LGBTIQ+ population in India: An analysis of online media reports of the past decade. *J Public Health (Oxf)*. 2023 Mar 14; 45(1):e95–e103. <https://doi.org/10.1093/pubmed/fdab378> PMID: 34747474. eng.
101. Sakai K, Tanifuji T. Suicides Among Lesbian, Gay, Bisexual, and Transgender People: Medical Examiner Reports in the Special Wards of Tokyo, Japan, 2009–2018. *LGBT Health*. 2021 Nov; 8(8):519–25. <https://doi.org/10.1089/lgbt.2020.0266> PMID: 34582270. Epub 20210928. eng.
102. Fatima SM, Ahmed Lak T, Mushtaque I. Cases of Transgender Killing in Pakistan. *Asia Pac J Public Health*. 2022 Sep; 34(6–7):660–1. <https://doi.org/10.1177/10105395221107134> PMID: 35703386. Epub 20220615. eng.
103. Sell RL, Holliday ML. Sexual orientation data collection policy in the United States: public health malpractice. *Am J Public Health*. 2014 Jun; 104(6):967–9. <https://doi.org/10.2105/AJPH.2013.301814> PMID: 24825192. PMCID: PMC4061997. Epub 20140417. eng.
104. Pega F, Gray A, Veale JF, Binson D, Sell RL. Toward global comparability of sexual orientation data in official statistics: a conceptual framework of sexual orientation for health data collection in New Zealand's official statistics system. *J Environ Public Health*. 2013; 2013:473451. <https://doi.org/10.1155/2013/473451> PMID: 23840231. PMCID: PMC3694548. Epub 20130612. eng.
105. O'Brien RP, Blosnich JR. Refusal Rates to Sexual Orientation and Gender Identity Items in the Behavioral Risk Factor Surveillance System, 2014–2019. *Am J Public Health*. 2022 Mar; 112(3):443–52. <https://doi.org/10.2105/AJPH.2021.306625> PMID: 35196048. PMCID: PMC8887176. eng.
